# Supplementary material
Source: Research Square preprint supplement (doi:10.21203/rs.3.rs-8525913/v1)
Supplement: Supplementary file 1 [file d309a7dd96ab8646e0bd9b72.docx]

**Supplementary information for**

Reinforcement Learning-Driven Conversion Designed Minibinders to Small Molecules Targeting Porcine Nectin-1 IgV Domain for Anti-PRV Therapy

Lin Weia,b,c,1, Yang Hua,1, Peng Chena,1, Yuhua Chena,1, Keke Wanga, Jun Wenga,e, Banbin Xinga, Ke Minga,b,c, Zhiyong Wua, Miaomiao Genga, Zhang Liua, Guolin Wanga, Yun Youa, Yihe Fanga, Yanxia Liua, Wenxia Zhanga, Haixia Xianga, Zigong Weia,b,c,d*

aState Key Laboratory of Biocatalysis and Enzyme Engineering, School of Life Sciences, Hubei University, Wuhan, Hubei, PR China

bAnimal Innovative Drug Research Center, School of Life Sciences, Hubei University, Wuhan, Hubei, PR China

cHubei Jiangxia Laboratory, Wuhan, Hubei, PR China

dHubei Province Key Laboratory of Biotechnology of Chinese Traditional Medicine, National & Local Joint Engineering Research Center of High-throughput Drug Screening Technology, School of life sciences, Hubei University, Wuhan, Hubei, PR China

eKey Laboratory of Molecular Biophysics of Ministry of Education, College of Life Science and Technology, Huazhong University of Science and Technology, Wuhan, Hubei 430074, China

*Corresponding authors. Z. W., E-mail: [weizigong@163.com](mailto:weizigong@163.com); weizigong@hubu.edu.cn.

1These authors contributed equally to this work

**Table of Contents:**

**Part I: Figures and Tables** S3

**Part II**. **Computational and Experimental Section**S19

2.1 Expression, purification of minibinders. S19

2.2 Expression, purification of Avi-tag labeled Nectin-1 IgV domain. S19

**Part III. Chemistry.** S23

SM1S24

SM2S26

SM3S29

SM4S31

SM5S35

SM6S38

**Part IV. Pharmacokinetic study of compound SM1 in Kunming mice.**S42

**Part V. Details for AI-Driven Mini-Binder to Small-Molecule Conversion for PPI inhibitors.** S46

**Part I**. Figures and Tables.


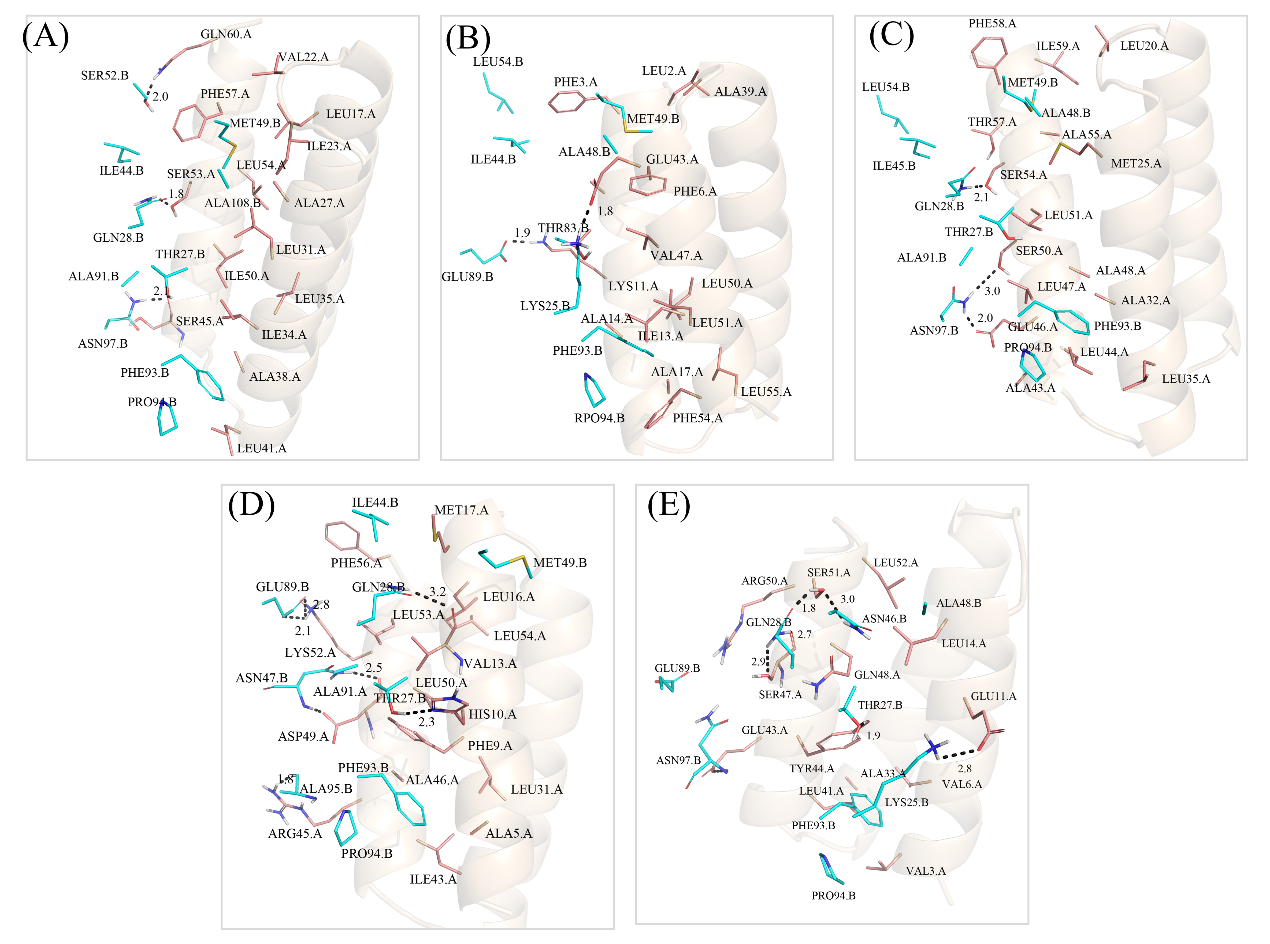


**Fig. S1**. Predicted binding modes by AlphaFold2. **(A)**Binding modes for **B1** (chain A, similarly here in after)**,** SER45, SER53, GLN60 forms a hydrogen bond with ASN97, GLN28, SER52 of Nectin-1, respectively. Hydrophobicity residues LEU17, ALA22, ILE23, ALA27, LEU31, ILE34, LEU35, ALA38, LEU41, ILE50, LEU54, PHE57 bind to hydrophobic in Nectin-1 (chain B, similarly here in after) comprising ILE44, MET49, PHE93, PRO94. (B) Binding modes for **B2**, GLU43, LYS11 forms hydrogen bonds and forms salt bridge with LYS25, GLU89, respectively. PHE54 forms a π-π stacking with PHE93 of Nectin-1. The hydrophobic surface consisting of LEU2, ALA39, PHE6, VAL47, LEU50, LEU51, ALA14, ILE13, ALA17, LEU55, PHE54, PHE3 combines with the hydrophobic surface consisting of ILE44, ALA48, MET49, LU54, PHE93, PRO94 of Nectin-1. (C) Binding modes for **B3**, GLU46, SER50, SER54 form hydrogen bonds with LEU221, ASN97, ASN97, respectively. The hydrophobic surface consisting of PHE58, ILE59, LEU20, ALA48, ALA55, MET25, LEU51, LEU47, ALA32, LEU44, LEU35, combines with the hydrophobic surface consisting of MET49, ALA48, LEU54, ILE45, ALA91, PHE93, PRO94 of Nectin-1. (D) Binding modes for **B4**, ASP49, ARG45, VAL13, HIS10 forms hydrogen bonds with ASN47, ALA95, GLN28, THR27 respectively, while LYS52 forms hydrogen bonds and forms salt bridge with GLU89. PHE9 forms a π-π stacking with PHE93 of Nectin-1. The hydrophobic surface consisting of ILE43, ALA5, LEU31, PHE9, ALA46 combines with the hydrophobic surface consisting of PHE93 of Nectin-1. (E) Binding modes for **B5**, SER47, TYP44, GLU43, forms hydrogen bonds with GLN28, THR27, ASN97 respectively, while SER51 forms hydrogen bonds with GLN28, ASN46. while GLU11 forms hydrogen bonds and forms salt bridge with LYS25. ARG50 forms salt bridge with GLU89. TYR44 forms a π-π stacking with PHE93 of Nectin-1. The hydrophobic surface consisting of LEU52, LEU14, combines with the hydrophobic surface consisting of ALA48 of Nectin-1. The hydrophobic surface consisting of ALA33, VAL6, LEU41, VAL3, TYR44 combines with the hydrophobic surface consisting of PHE93, PRO94 of Nectin-1.


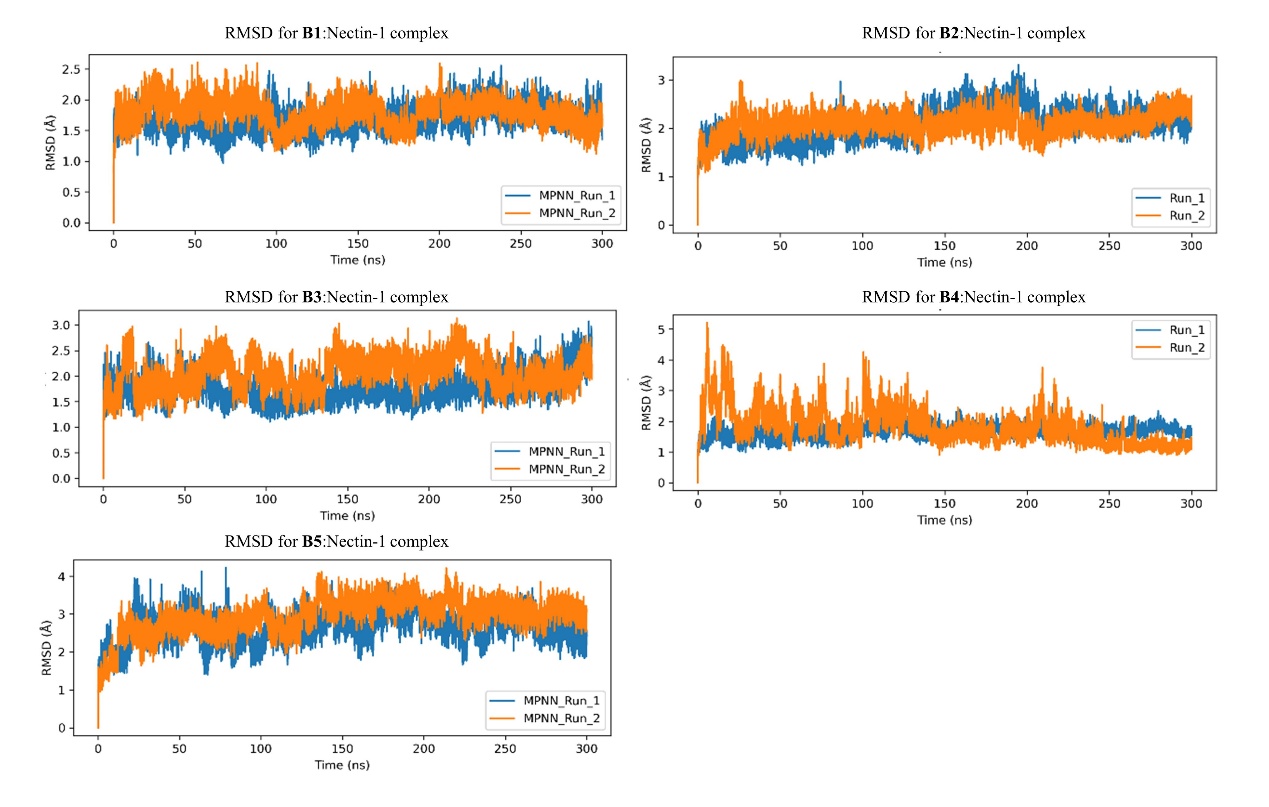


**Fig. S2.** Root-mean-square deviation (RMSD) for the MD simulations forall 5 minibinders.


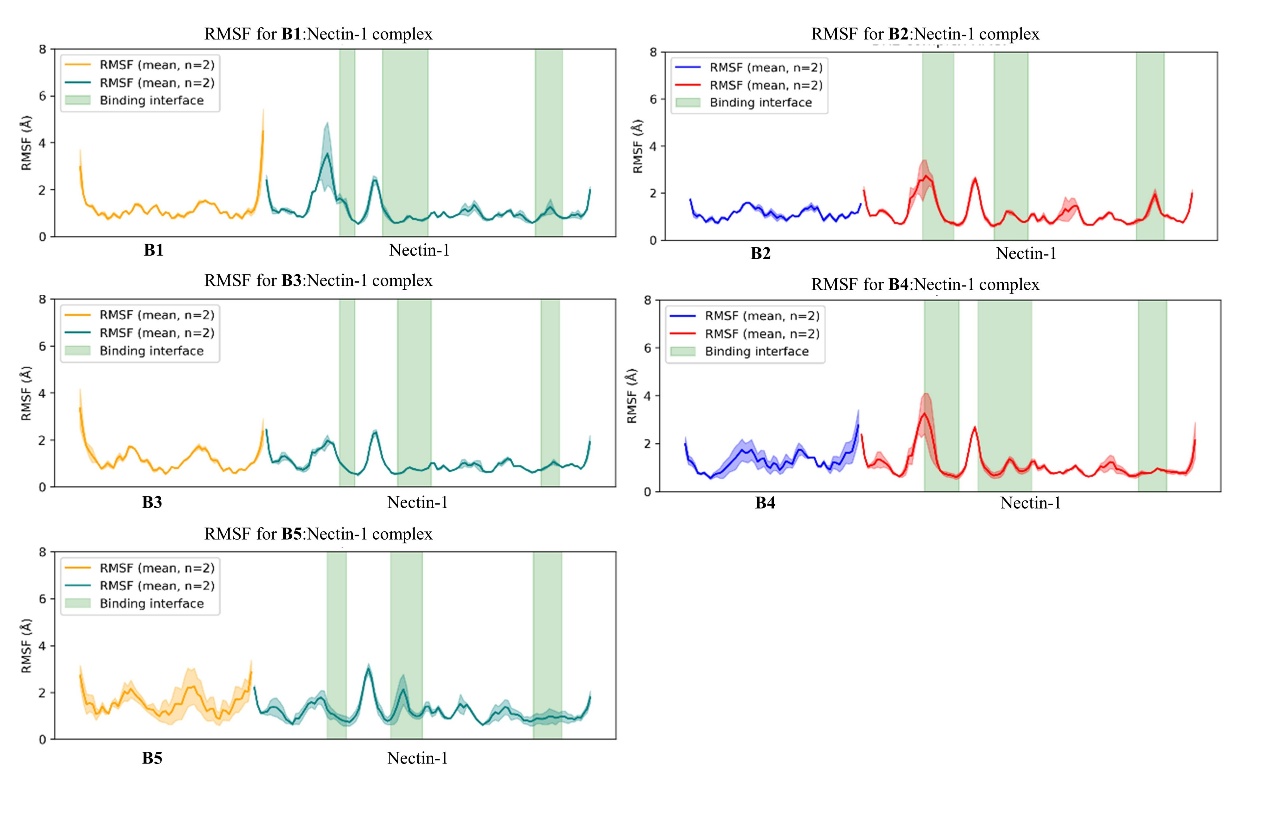


**Fig. S3.** Root-mean-square fluctuation (RMSF) for the MD simulations for all 5 minibinders.


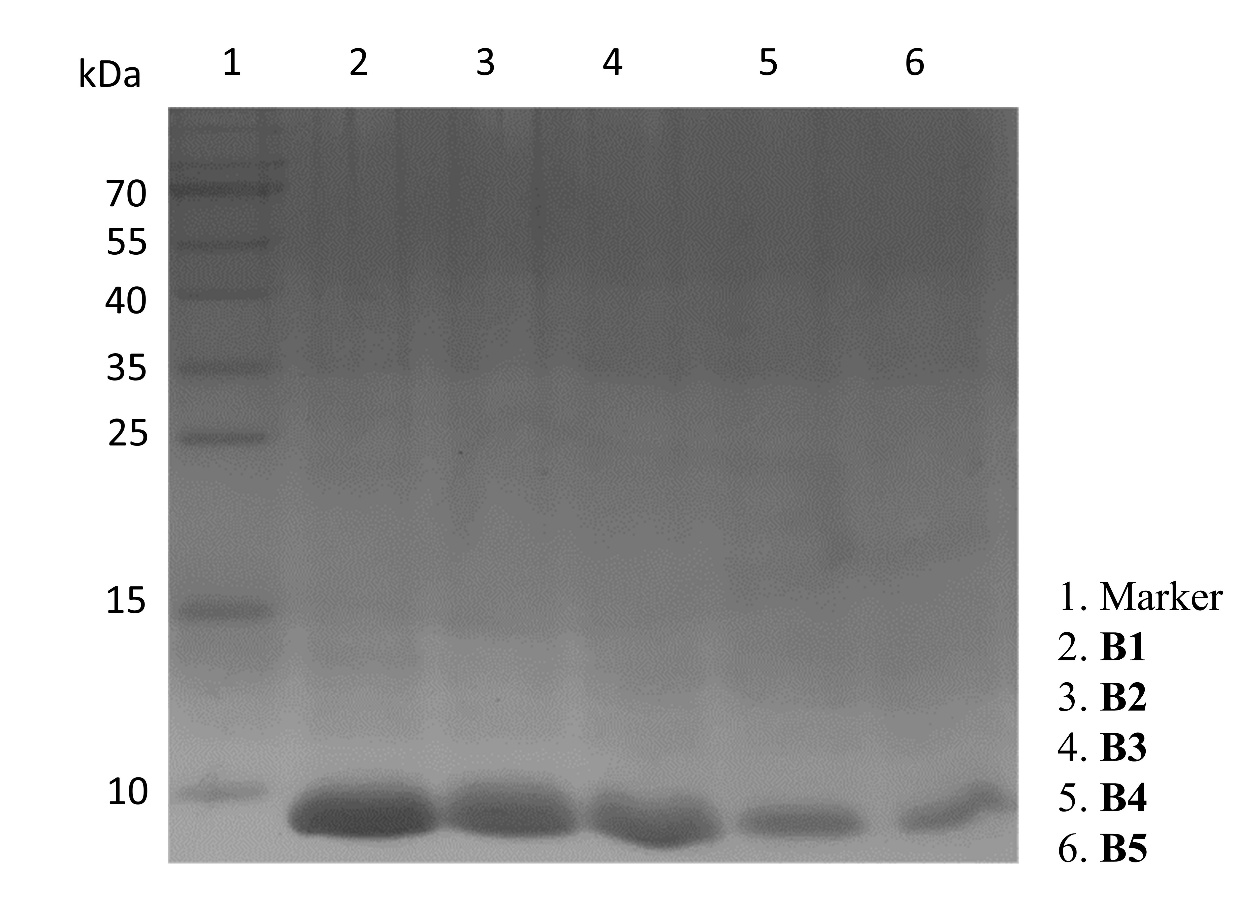


**Fig. S4.** SDS-PAGE confirming the expression and purification of **B1–B5**.

**Table S1.** Primers used in this work.

| Primers | Sequence (5′ to 3′) |
| --- | --- |
| pET-22b F | cctgcggcaatcaataattt |
| pET-22b R | taagagctccgtcgacaagc |
| **B1** F | aagaaggagaTATACATATGcaccatcatcatcatcatTCAGAAATAGAGGCTCTAGC |
| **B1** R | gcttgtcgacggagctcTTAGCAGGCCTGCGCCACGAAGGTC |
| **B2** F | aagaaggagaTATACATATGcaccatcatcatcatcatGATCTGTTCCACGAATTTGCC |
| **B2** R | gcttgtcgacggagctcTTAGCAGCGCAGAAACTCTTCGAGTAATTTAAC |
| **B3** F | aagaaggagaTATACATATGcaccatcatcatcatcatAACAAAGAAGAACTCAAGAAG |
| **B3** R | gcttgtcgacggagctcTTAGCAAGAGTTGATAAACGTCTTTG |
| **B4** F | aagaaggagaTATACATATGcaccatcatcatcatcatAGCCATGAAGAGGCGGAGCGC |
| **B4** R | gcttgtcgacggagctcTTAGCAGAACTTCAGCAGCTTCTTAAG |
| **B5** F | aagaaggagaTATACATATGcaccatcatcatcatcatGCCGCCGTTGAAGAAGTAGAG |
| **B5** R | gcttgtcgacggagctcTTAGCAGAACAATTTCAGGGAACGTG |
| β-actin F | ACTGTCGAGTCGCGTCCA |
| β-actin R | GTCATCCATGGCGAACTGGT |
| IL1β F | GAAATGCCACCTTTTGACAGTG |
| IL1β R | TGGATGCTCTCATCAGGACAG |
| IL6 F | TCTATACCACTTCACAAGTCGGA |
| IL6 R | GAATTGCCATTGCACAACTCTTT |
| TNF-α F | CAGGCGGTGCCTATGTCTC |
| TNF-α R | CGATCACCCCGAAGTTCAGTAG |
| PRV gB F | GCGGCATCGCCAACTTCTTCC |
| PRV gB R | GCCTCGTCCACGTCGTCCTCTT |


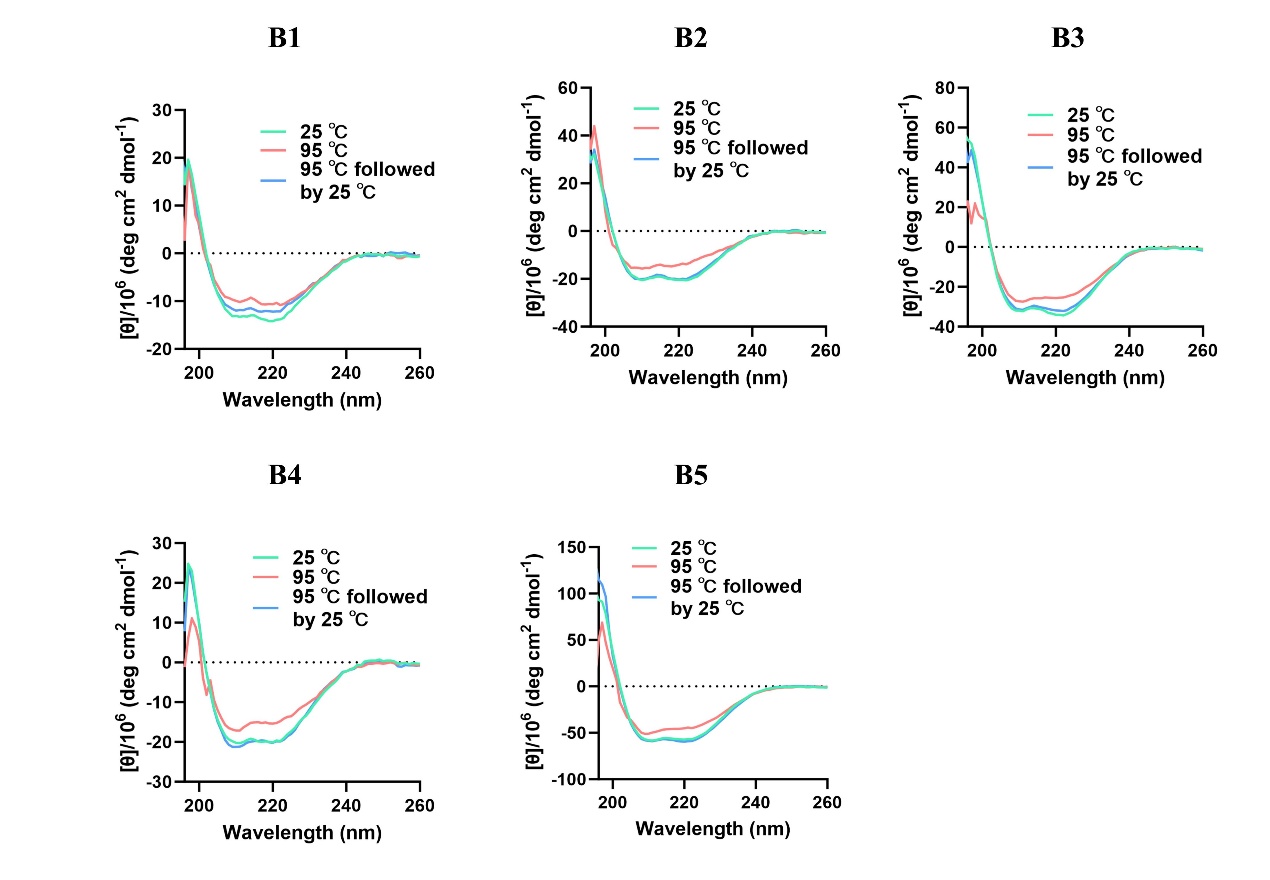


**Fig. S5**. Circular dichroism spectra of **B1–B5** recorded at different temperatures.

**
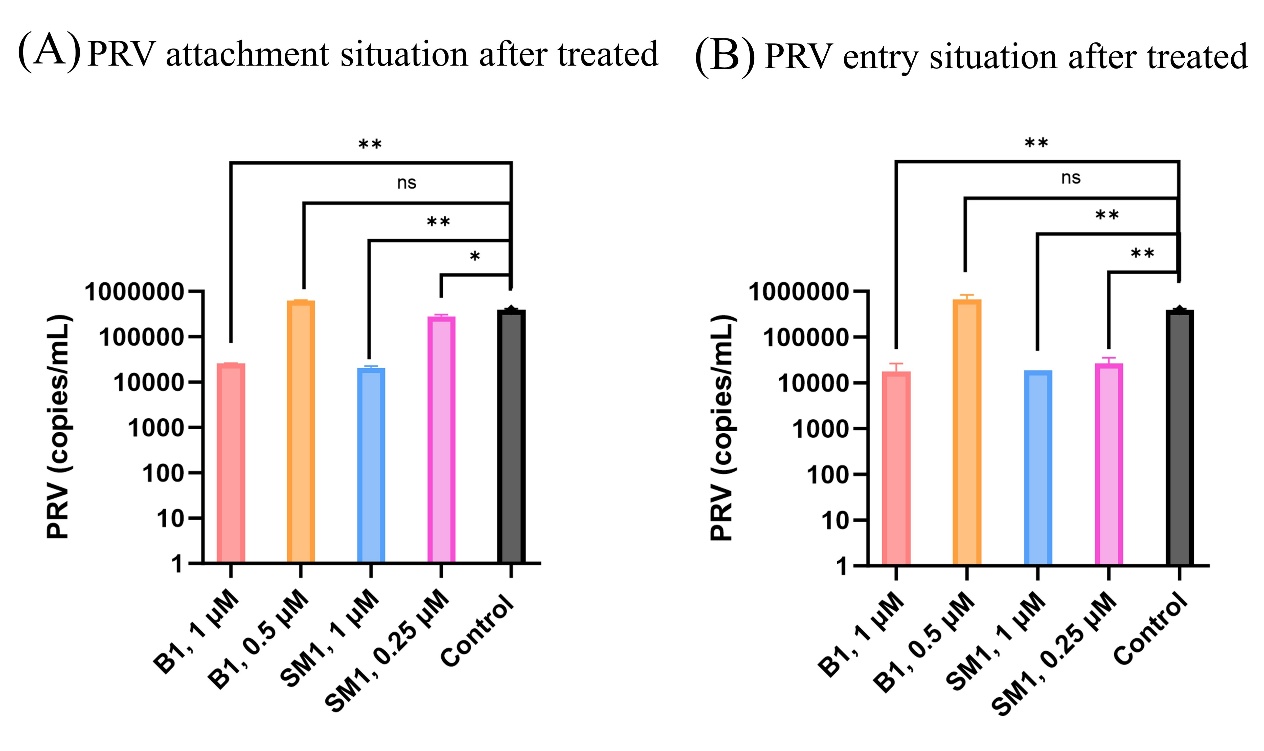
**

**Fig. S6**. (A) Effect of **B1** or **SM1** on PRV attachment to PK15 cells. (B) Effect of **B1** or **SM1** on PRV entry into PK15 cells. Statistical significance: **p <0.01. *p <0.05. ns = not significant (p > 0.05); determined by two-tailed Student's t-test assuming equal variance (GraphPad Prism 6).

**Table S2**. The details for PRV copies in brain after treated.

| Agents | Mouse ID | | PRV copies in Brain (copies/g) |
| --- | --- | --- | --- |
| **B1**-treated | Treat Group | **A1** | 2.6 ×104 |
| **A2** | 1.7 ×103 |
| **A3** | 5.6 ×103 |
| **A4** | 2.7 ×103 |
| **A5** | 1.6 ×104 |
| Blank Group | **B1** | 4.2 ×106 |
| **B2** | 1.8 ×106 |
| **B3** | 9.1 ×106 |
| **B4** | 4.8 ×107 |
| **B5** | 3.8 ×105 |
| **SM1**-treated | Treat Group | **C1** | 1.2 ×105 |
| **C2** | 3.0 ×104 |
| **C3** | 4.7 ×104 |
| **C4** | 5.8 ×103 |
| **C5** | 7.2 ×103 |
| Blank Group | **D1** | 2.3 ×106 |
| **D2** | 3.5 ×106 |
| **D3** | 5.0 ×105 |
| **D4** | 1.2 ×107 |
| **D5** | 7.7 ×106 |


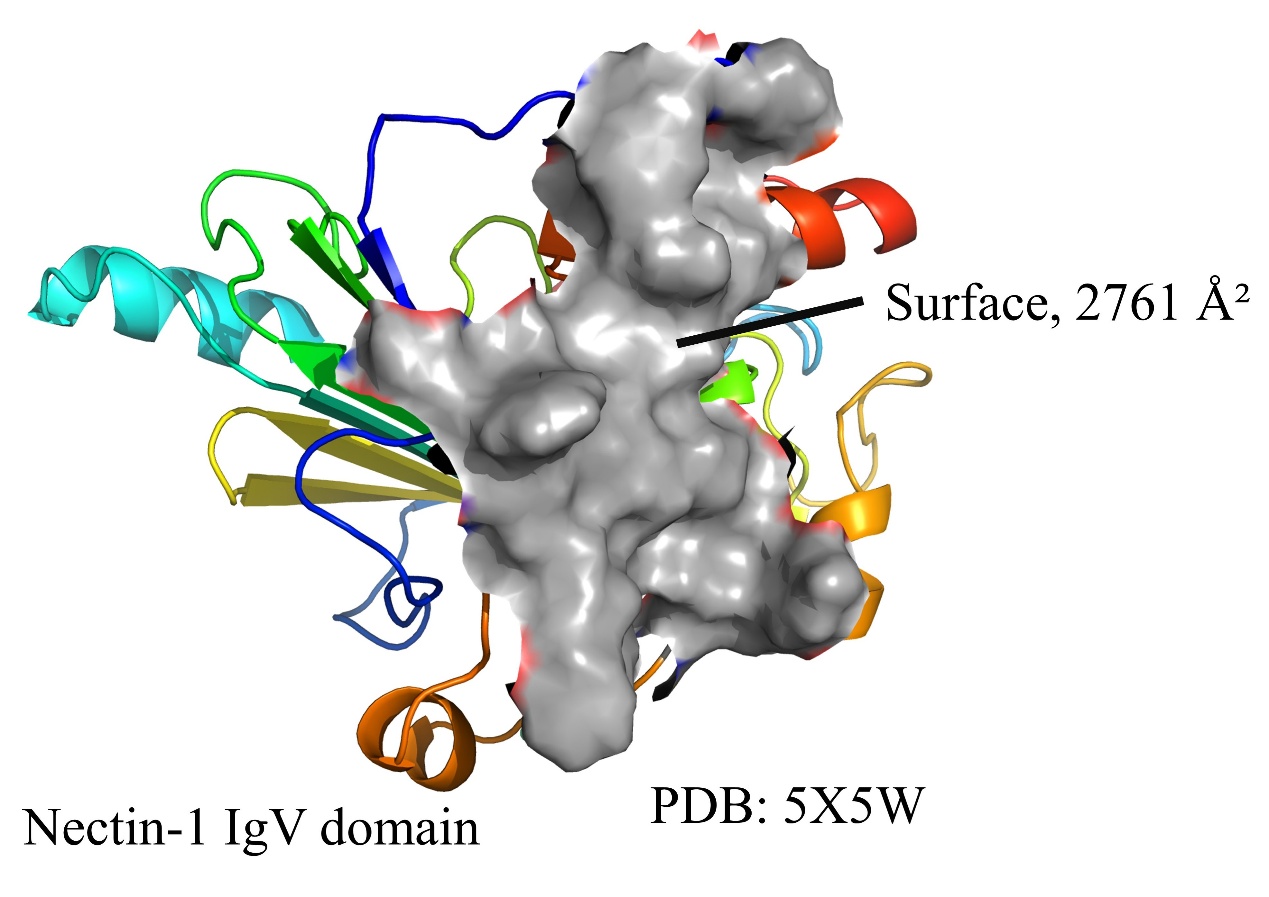
**Fig. S7**. Solvent-accessible surface area of the Nectin-1 IgV domain interface.

**Table S3**. Per-residue binding free energy decomposition (MM/GBSA) for the **B1**:Nectin-1 complex.

| Nectin-1 | | | | BR1O2 | | | |
| --- | --- | --- | --- | --- | --- | --- | --- |
| Res. | ΔG  (kcal/mol) | Res. | ΔG  (kcal/mol) | Res. | ΔG  (kcal/mol) | Res. | ΔG  (kcal/mol) |
| LYS25 | -1.00±1.96 | SER52 | -2.48±0.32 | LEU14 | -0.19±0.33 | LEU41 | -0.55±0.32 |
| ILE26 | 0.13±0.37 | VAL53 | -0.75±0.39 | LEU17 | -0.58±0.32 | ASN43 | 0.14±0.46 |
| THR27 | 0.16±0.47 | LEU54 | -1.30±0.30 | VAL22 | -0.65±0.34 | LEU44 | -0.05±0.34 |
| GLN28 | -1.01±0.44 | ALA55 | -0.04±0.25 | ILE23 | -2.21±0.34 | SER45 | 0.22±0.45 |
| THR30 | 0.05±0.28 | ARG58 | -1.05±0.81 | SER24 | -0.16±0.38 | LEU46 | -2.45±0.32 |
| GLN32 | 0.08±0.40 | GLU89 | 1.45±0.92 | ALA27 | -0.25±0.26 | VAL47 | -0.13±0.29 |
| ASN41 | -1.07±0.41 | PHE90 | -0.04±0.35 | ALA28 | -0.13±0.26 | GLU48 | 0.38±0.75 |
| ALA43 | -0.11±0.24 | ALA91 | -0.09±0.26 | GLU30 | -1.44±0.44 | SER49 | -1.30±0.39 |
| ILE44 | -3.32±0.32 | THR92 | 0.01±0.34 | LEU31 | -0.93±0.35 | ILE50 | -1.92±0.34 |
| TYR45 | -0.36±0.36 | PHE93 | -3.66±0.36 | ALA33 | 0.03±0.25 | GLN52 | -1.04±0.69 |
| ASN46 | -0.42±0.41 | PRO94 | -2.54±0.29 | ILE34 | -2.35±0.35 | SER53 | -2.11±0.27 |
| PRO47 | -0.01±0.28 | ALA95 | -0.22±0.29 | LEU35 | -0.13±0.32 | LEU54 | -0.77±0.33 |
| ALA48 | -0.65±0.25 | GLY96 | -0.26±0.27 | GLU37 | -0.28±0.85 | THR56 | -2.19±0.37 |
| MET49 | -5.30±0.32 | ASN97 | -1.02±0.55 | ALA38 | -0.19±0.26 | PHE57 | -6.62±0.36 |
| GLY50 | -0.04±0.23 | ARG98 | -0.60±0.85 | ILE39 | -0.01±0.34 | ALA59 | -0.92±0.51 |
| VAL51 | -0.44±0.33 |  |  | GLU40 | 0.15±0.82 | GLN60 | -1.87±0.59 |


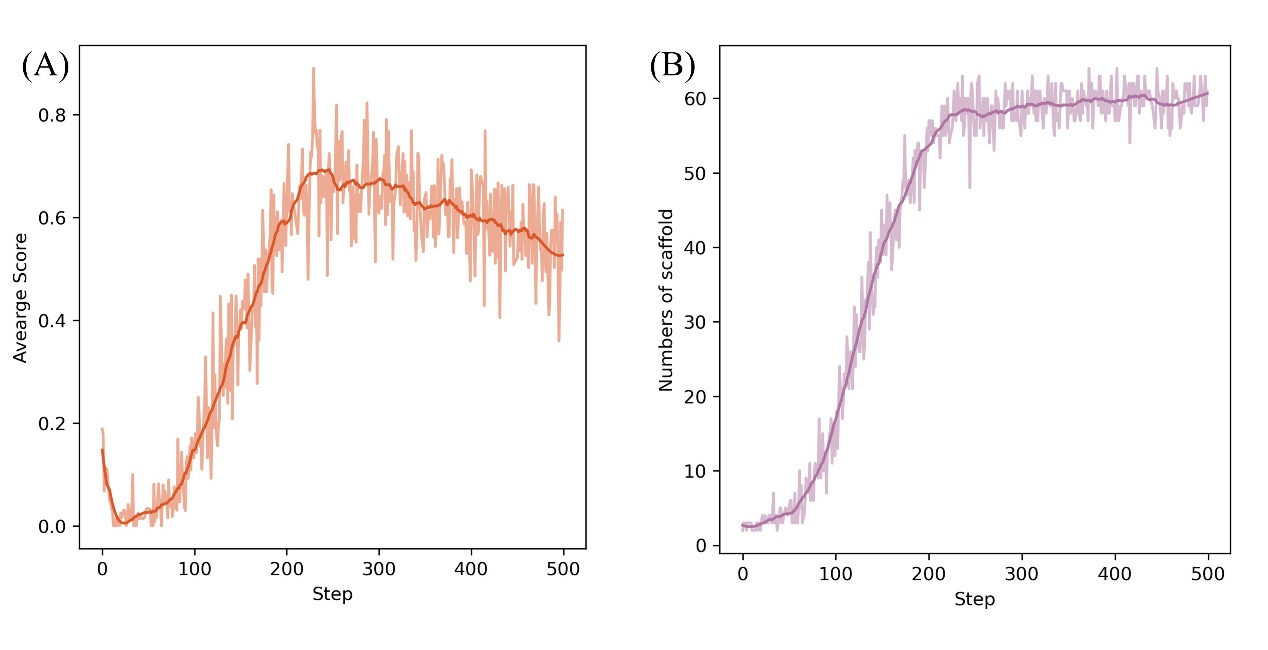


**Fig. S8**. (A) The average score in RL training steps. (B) Numbers of scaffolds in RL training steps.


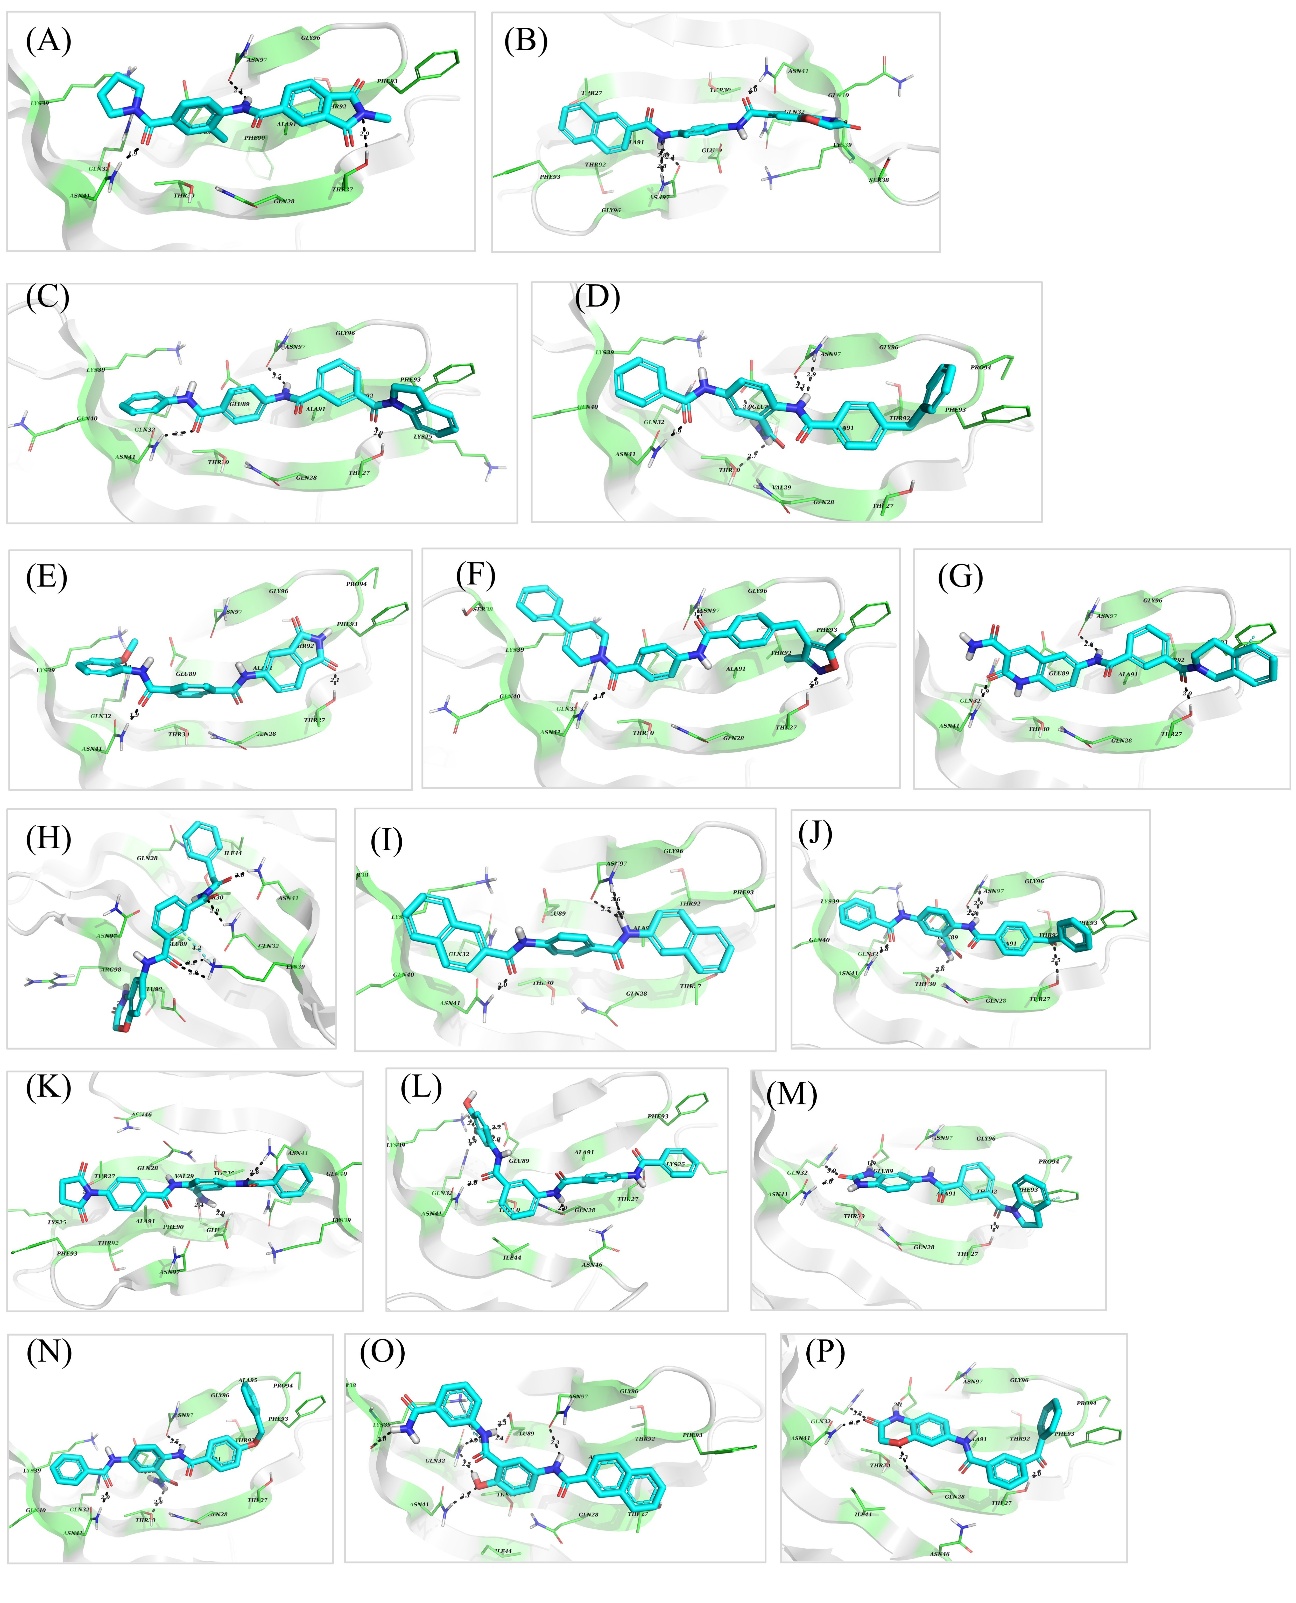


**Fig. S9**. The binding mode of **h1**-**h28**(A-AB), **h30**(AC) predicted by Autodock Vina. (To be Continued)


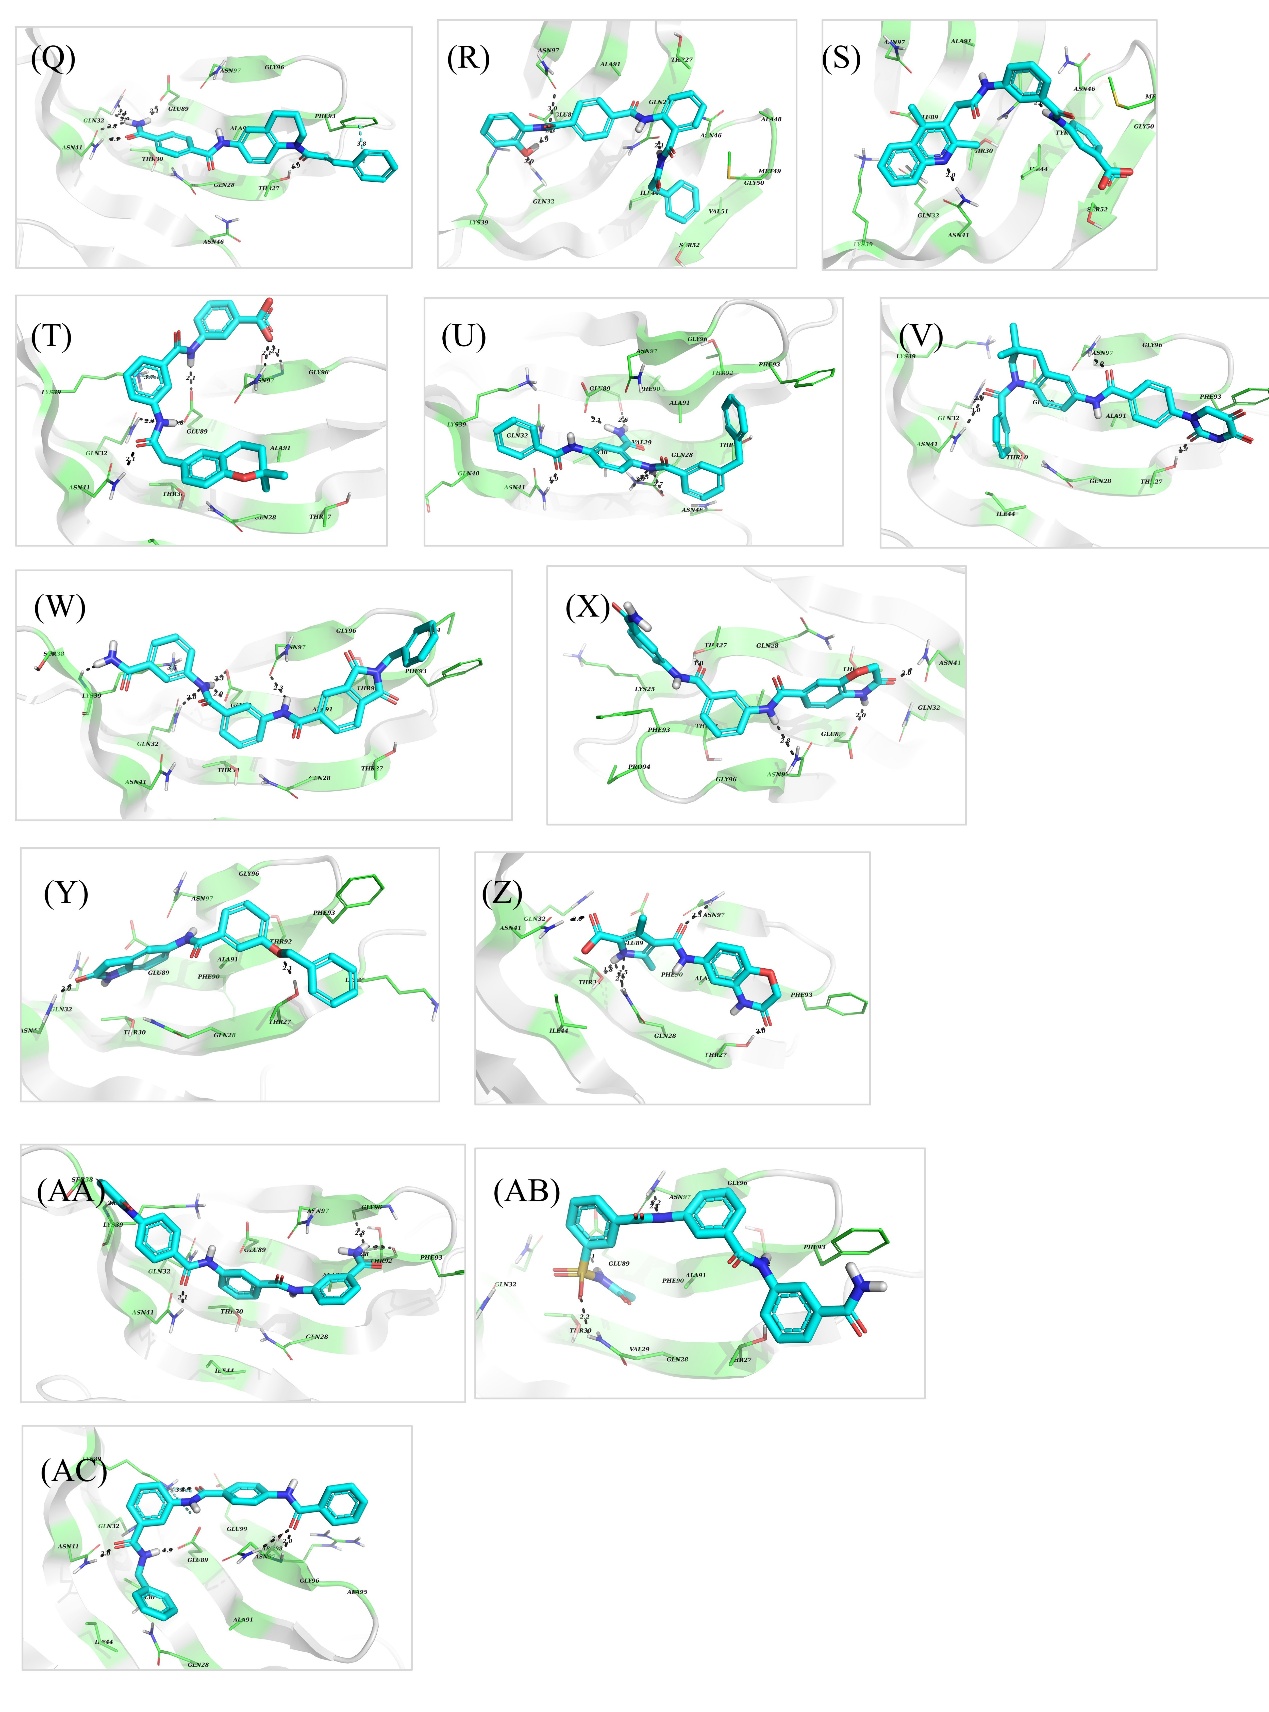


**(Continued) Fig. S9**. The binding mode of **h1**-**h28**(A-AB), **h30**(AC) predicted by Autodock Vina.

**Part II**. **Computational and Experimental Section**

*2.1 Expression, purification of binders*

The genes encoding the minibinders were cloned into a pET-22b vector with a C-terminal 6×His tag via infusion cloning. The constructs were transformed into *E. coli* BL21(DE3) competent cells, and protein expression was induced with IPTG at 18 °C for 20 hours. Cells were harvested by centrifugation (7,000 rpm, 10 min) and lysed by sonication. PMSF (100 mM) was added to inhibit proteolysis. The lysate was applied to a Ni-NTA affinity column, washed with buffer containing 30 mM imidazole, and eluted with 300 mM imidazole. Further purification was performed using an FPLC system equipped with a Superdex 75 Increase 10/300 column (Cytiva). Protein concentration was determined with a BCA assay kit (Biosharp, BL521A), and purity was verified by SDS-PAGE.

*2.2 Expression, purification of Avi-tag labeled Nectin-1 IgV domain*

Bacterial culture was centrifuged at 10,000 × g for 20 min to collect the pellet. The pellet was resuspended in lysis buffer (50 mM Tris, 5 mM EDTA, 150 mM NaCl, pH 8.0) at a 9:1 (v/w) ratio and lysed by double-pass homogenization at 300 bar and 700 bar, achieving >95% disruption. The lysate was centrifuged (10,000 × g, 30 min) to collect crude inclusion bodies. These were washed sequentially with: (1) 50 mM Tris, 5 mM EDTA, 150 mM NaCl, 1% Triton X-100, 2% sodium deoxycholate, pH 8.0; (2) the same buffer supplemented with 2 M urea; and (3) lysis buffer to remove detergents. The purified inclusion bodies were solubilized in denaturation buffer (50 mM Tris, 8 M urea, 80 mM Cys, pH 9.7) at a 9:1 (v/w) ratio. After centrifugation (10,000 × g, 10 min), the supernatant was adjusted to 7 mg/mL and refolded by 40-fold dilution into reconstitution buffer (50 mM Tris, 0.78 M urea, 10 mM MgSO4, pH 9.7) with stirring at 4 °C for 40 h. The refolded protein was acid-precipitated (pH 5.0), centrifuged, and the supernatant was purified by SPFF cation-exchange chromatography. Purity was confirmed by SDS-PAGE (**Fig. S10**).


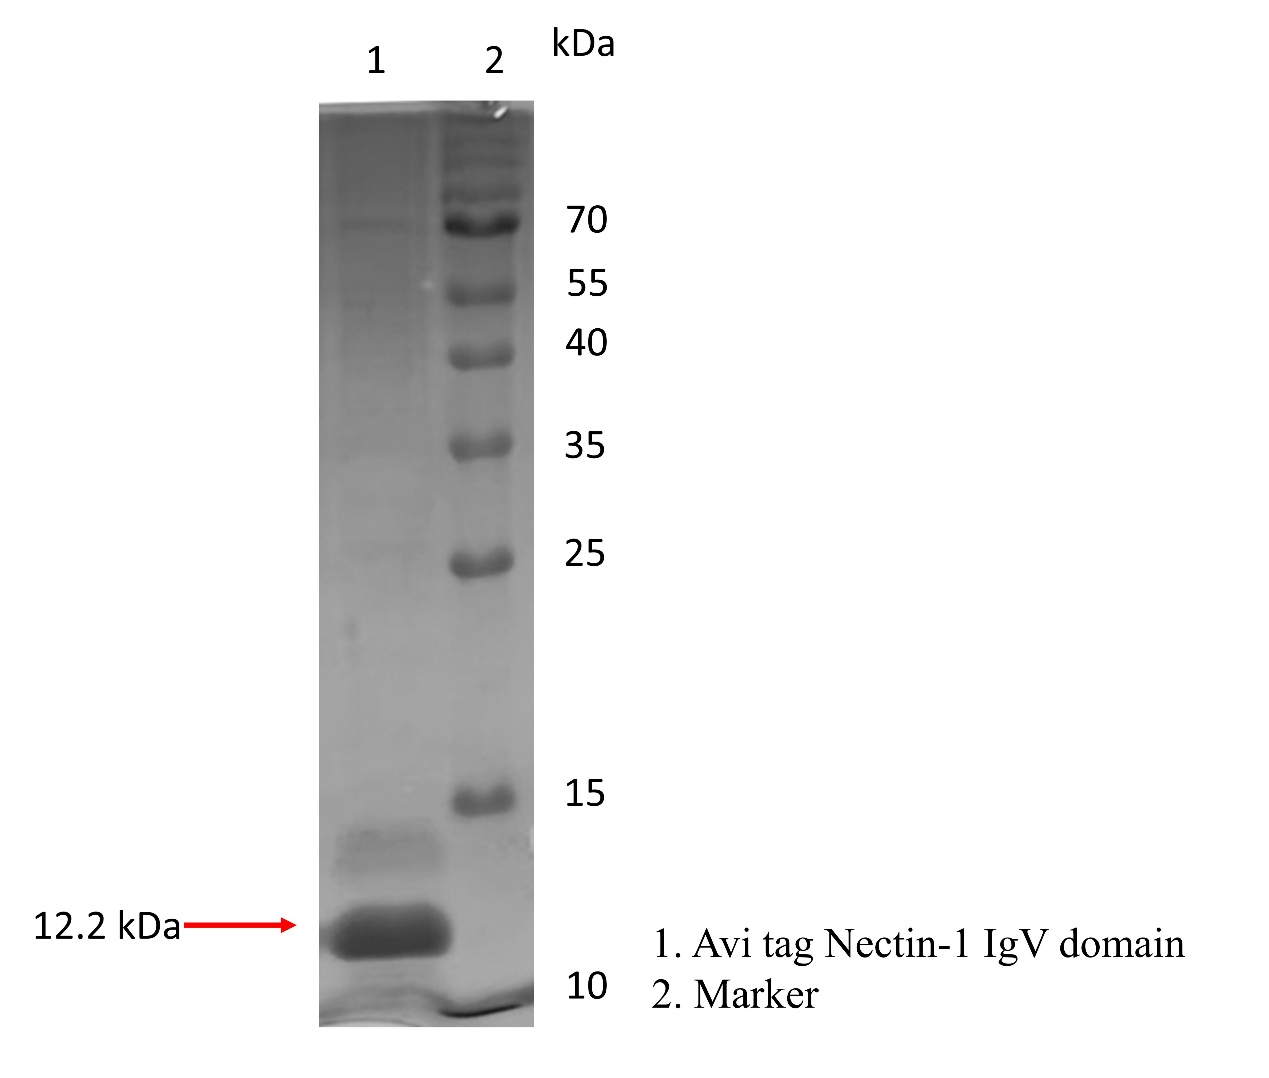


**Fig. S10.** SDS-PAGE analysis for Avi-tag Nectin-1 IgV domain.

**Part III. Chemistry.**

The synthetic procedures for **WLN2** are as follows (**Sheme 1**). *N,N,N',N'*-tetramethylchloroformamidinium hexafluorophosphate(TCFH) (3.42 g, 12.18 mmol) was added to a solution of 2-amino-6-methylphenol (12.18 mmol), (tert-butoxycarbonyl) glycine (boc-GLY) (9.74 mmol) and *N-*methylimidazole (NMI) (1.69 g, 20.30 mmol) in acetonitrile (MeCN; 20 mL). The mixture was stirred for 5 hours at room temperature and monitored by TLC. The reaction mixture was diluted with a saturated aqueous solution of NaHCO3, and the aqueous phase was extracted three times with ethyl acetate (EtOAc). The combined organic layers were then washed with brine, dried over anhydrous Mg2SO4, filtered, and concentrated under reduced pressure. The resulting residue was purified by silica gel column chromatography to yield tert-butyl (2-((2-hydroxy-3-methylphenyl)amino)-2-oxoethyl)carbamate (**SM1b**).

Trifluoroacetic acid (TFA) was added (10 mL) to a solution of **SM1b** in anhydrous dichloromethane (DCM) (15 mL). The reaction mixture was stirred for 3 h at room temperature, after which the solvent and excess reagent were removed under reduced pressure. The resulting residue was neutralized with a saturated aqueous solution of NaHCO₃ and the mixture was extracted with dichloromethane (3 × 15 mL). The combined organic layers were washed with brine (2 × 10 mL), dried over anhydrous Na₂SO₄, filtered, and concentrated under reduced pressure to yield 2-amino-N-(2-hydroxy-3-methylphenyl)acetamide (**SM1c**).

Triethylamine (TEA) was added to a solution of methyl (R)-2-aminobutanoate (0.60 g) in dichloromethane (20 mL). Benzoyl chloride was then added dropwise to the mixture at room temperature. The reaction was allowed to stir at room temperature until completion (monitored by TLC). Following the reaction, the mixture was concentrated under reduced pressure, and the resulting residue was purified directly by silica gel column chromatography to yield methyl (R)-2-benzamidobutanoate (**SM1e**).

**SM1e** (0.78 g) was dissolved in MeCN (8 mL), and then added water (164 μL), lithium bromide (3.0 g), and triethylamine (1.06 g) in it. The reaction mixture was stirred at room temperature for 12 h. Upon completion, the mixture was acidified to pH 2-3 with 1 M aqueous HCl and extracted with dichloromethane (3 × 15 mL). The combined organic layers were dried over anhydrous Na₂SO₄, filtered, and concentrated under reduced pressure. The resulting residue was then purified by silica gel column chromatography to afford (R)-2-benzamidobutanoic acid (**SM1f**).

TCFH (2.20 g, 7.86 mmol) was added to a solution of **SM1c** (5.24 mmol) , **SM1f** (6.29 mmol) and NMI (1.09 g, 13.10 mmol) in MeCN (15 mL). The mixture was stirred for 5 hours at room temperature and monitored by TLC. The reaction mixture was diluted with a saturated aqueous solution of NaHCO3, and the aqueous phase was extracted three times with ethyl acetate (EtOAc). The combined organic layers were then washed with brine, dried over anhydrous Mg2SO4, filtered, and concentrated under reduced pressure. The resulting residue was purified by silica gel column chromatography to yield (R)-N-(1-((2-((2-hydroxy-3-methylphenyl)amino)-2-oxoethyl)amino)-1-oxobutan-2-yl)benzamide (**SM1**).

Compounds **SM2**-**SM6** were synthesized according **SM1**, and **SM1e**, **SM1f** serve as common intermediates. All the yields shown is **Table S4**.

**Table S4**. The yields of **SM1**-**SM6**.

| Compds. | Step 1 | | Step 2 | | Step 3 | | Step 4 | | Step 5 | |
| --- | --- | --- | --- | --- | --- | --- | --- | --- | --- | --- |
| Compds. | yield | Compds. | yield | Compds. | yield | Compd. | yield | Compds. | yield |
| **SM1** | **SM1b** | 84.7% | **SM1c** | 86.1% | **SM1e** | 83.3% | **SM1f** | 70.5% | **SM1** | 41.8% |
| **SM2** | **SM2b** | 89.6% | **SM2c** | 94.2% | **SM2** | 39.1% |
| **SM3** | **SM3b** | 92.7% | **SM3c** | 90.1% | **SM3** | 67.4% |
| **SM4** | **SM4b** | 86.8% | **SM4c** | 82.3% | **SM4** | 61.1% |
| **SM5** | **SM5b** | 77.3% | **SM5c** | 87.4% | **SM5** | 36.7% |
| **SM6** | **SM6b** | 90.5% | **SM6c** | 92.5% | **SM6** | 71.6% |

The structures of the compounds **SM1-SM6** were confirmed by 1H NMR, 13C NMR, and HRMS analysis.

**SM1**

HPLC charomatogram


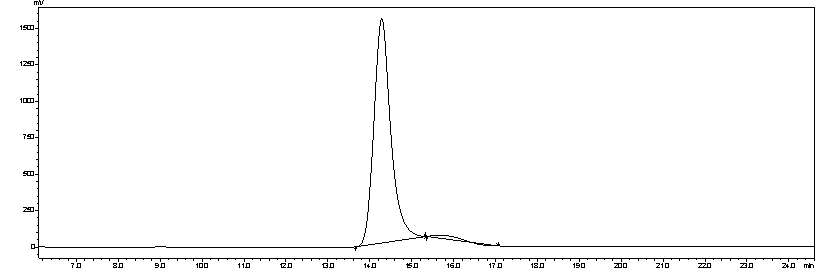


| Peak | Retention(min) | Area | Area % |
| --- | --- | --- | --- |
| 1 | 14.285 | 42973001 | 98.13 |
| 2 | 15.667 | 818261 | 1.87 |

1H NMR


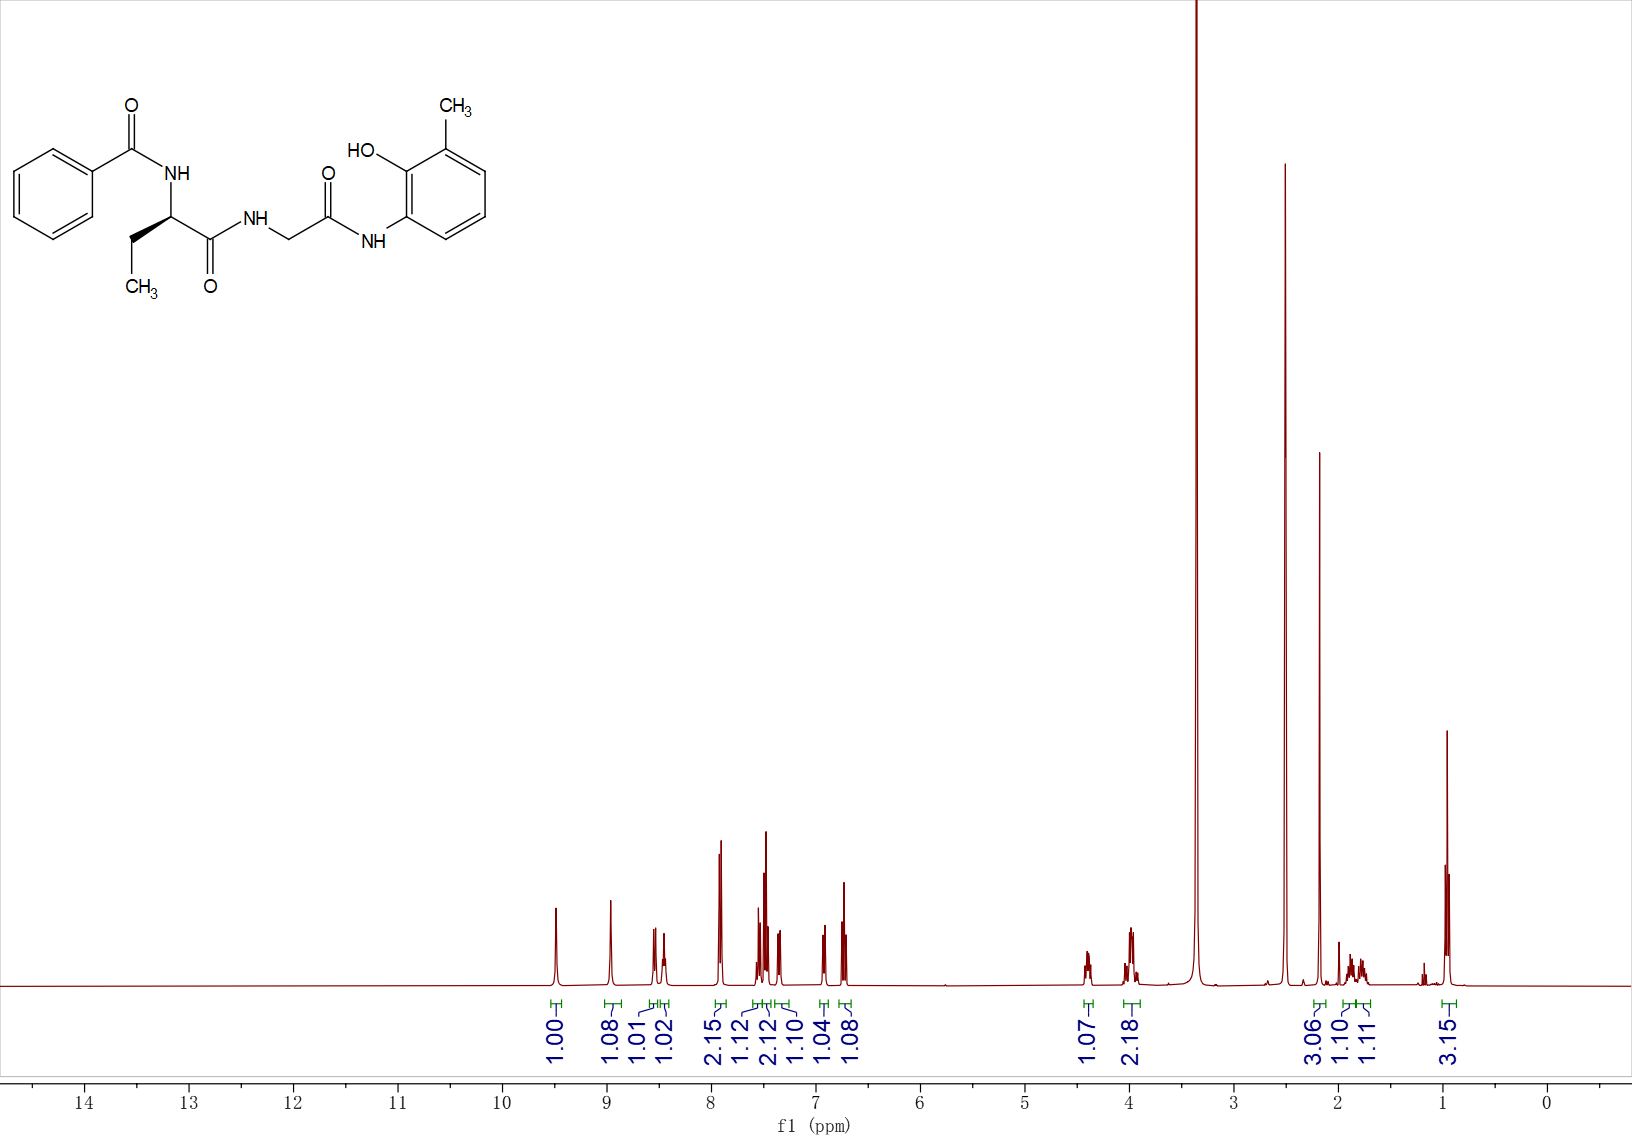


1H NMR (400 MHz, DMSO-*d6*, δ) 9.49 (s, 1H), 8.96 (s, 1H), 8.54 (d, *J* = 7.5 Hz, 1H), 8.45 (t, *J* = 5.8 Hz, 1H), 7.96 – 7.87 (m, 2H), 7.60 – 7.51 (m, 1H), 7.48 (dd, *J* = 8.2, 6.6 Hz, 2H), 7.39 – 7.31 (m, 1H), 6.92 (d, *J* = 7.3 Hz, 1H), 6.73 (t, *J* = 7.7 Hz, 1H), 4.40 (ddd, *J* = 9.0, 7.5, 5.4 Hz, 1H), 4.09 – 3.89 (m, 2H), 2.18 (s, 3H), 1.97 – 1.68 (m, 2H), 0.96 (t, *J* = 7.4 Hz, 3H).

13C NMR


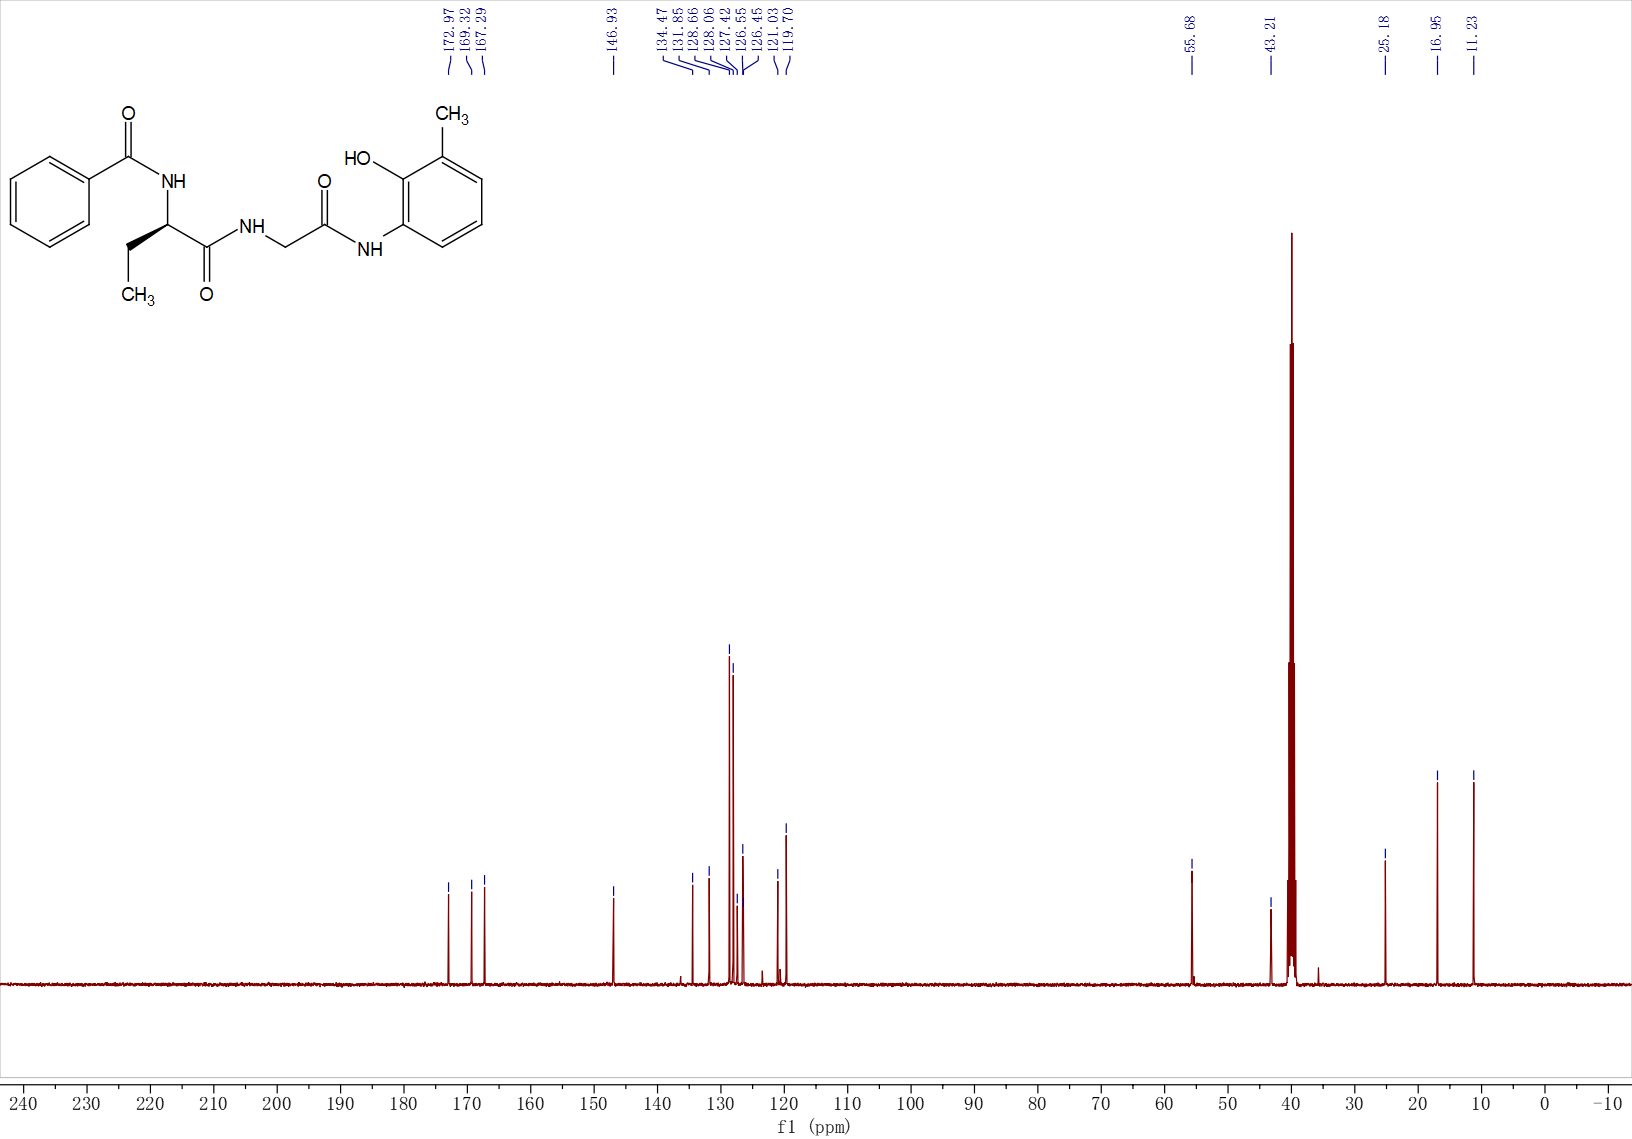


13C NMR (400 MHz, DMSO-*d6*, δ) 172.97, 169.32, 167.29, 146.93, 134.47, 131.85, 128.66, 128.06, 127.42, 126.55, 126.45, 121.03, 119.70, 55.68, 43.21, 25.18, 16.95, 11.23.

HRMS

HRMS (ESI) m/z: [M + H]+ calcd for C20H24N3O4, 370.17613; found, 370.17742.

**SM2**

HPLC charomatogram

**
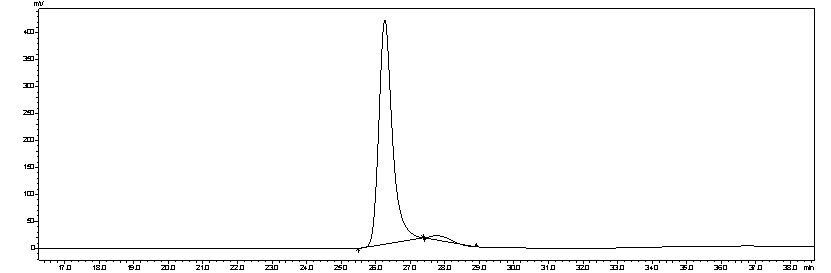
**

| Peak | Retention(min) | Area | Area % |
| --- | --- | --- | --- |
| 1 | 26.264 | 11368072 | 97.61 |
| 2 | 27.764 | 278167 | 2.39 |

1H NMR


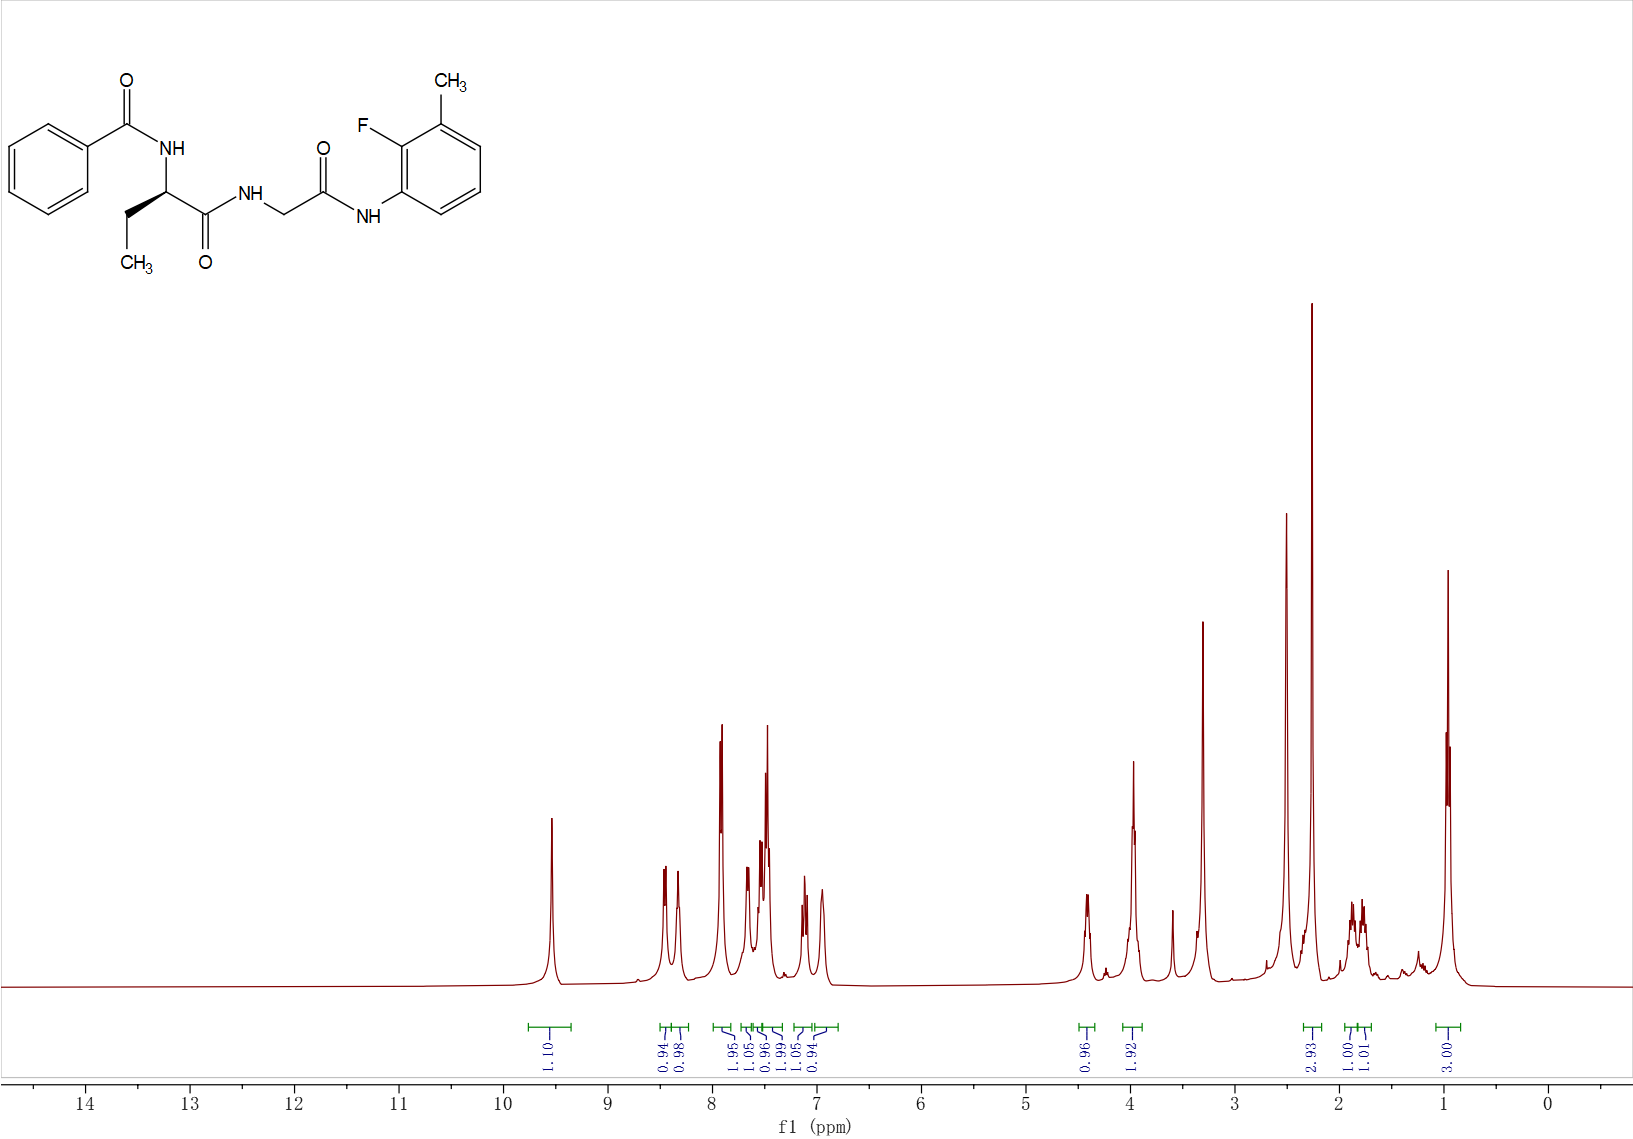


1H NMR (400 MHz, DMSO-*d6*, δ) 9.54 (s, 1H), 8.46 (d, *J* = 7.6 Hz, 1H), 8.33 (t, *J* = 5.9 Hz, 1H), 7.92 (d, *J* = 7.7 Hz, 2H), 7.66 (d, *J* = 7.5 Hz, 1H), 7.59 – 7.50 (m, 2H), 7.48 (d, *J* = 7.5 Hz, 1H), 7.11 (dq, *J* = 13.0, 4.2 Hz, 1H), 6.96 (d, *J* = 7.1 Hz, 1H), 4.41 (td, *J* = 8.3, 5.4 Hz, 1H), 3.98 (q, *J* = 8.0 Hz, 2H), 2.26 (s, 3H), 1.87 (dq, *J* = 13.9, 7.1 Hz, 1H), 1.82 – 1.69 (m, 1H), 0.96 (t, *J* = 7.4 Hz, 3H).

13C NMR


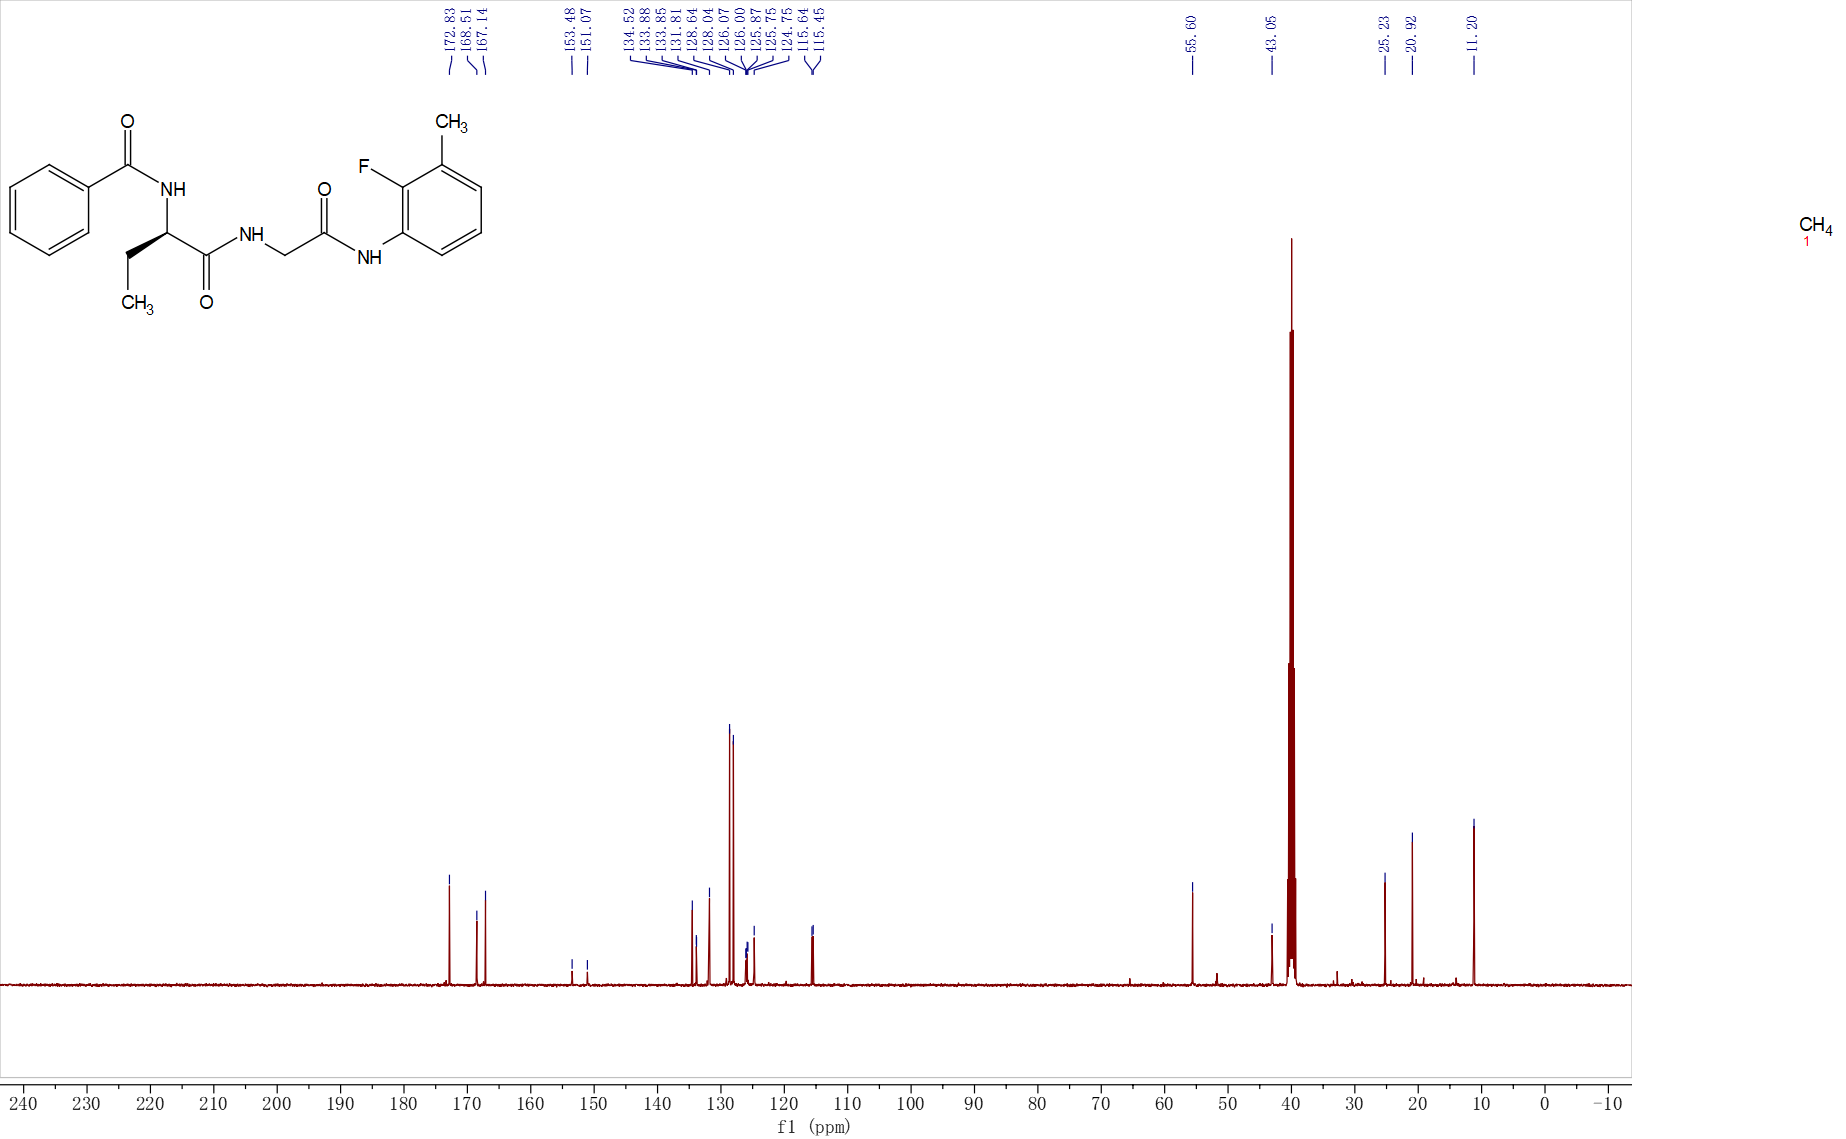


13C NMR (400 MHz, DMSO-*d6*, δ) 172.83, 168.51, 167.14, 153.48, 151.07, 134.52, 133.88, 131.81, 128.64, 128.04, 125.75, 124.75, 115.64, 55.60, 43.05, 25.23, 20.92, 11.20.

HRMS


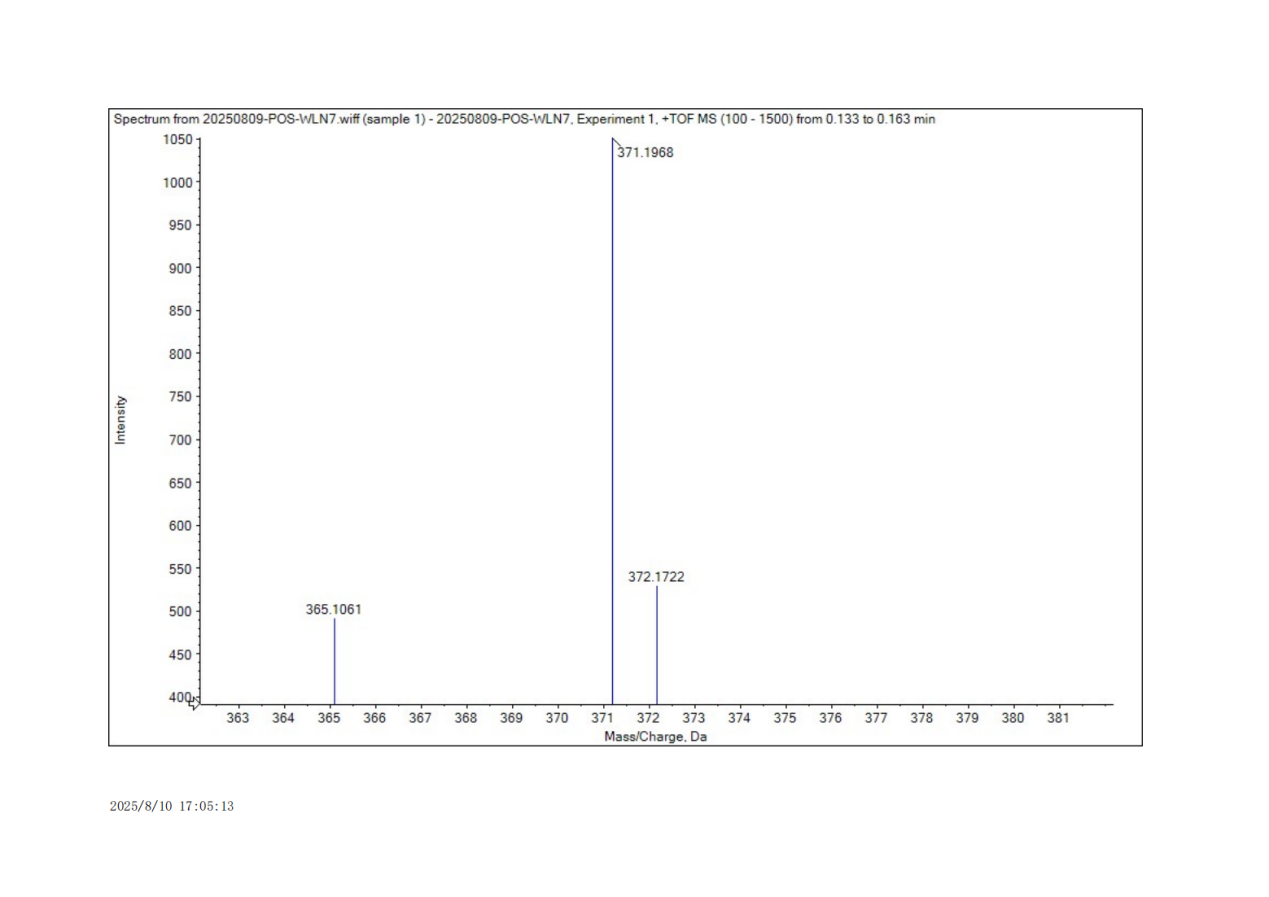


HRMS (ESI) m/z: [M + H]+ calcd for C20H23FN3O3, 372.1718; found, 371.1968.

**SM3**

HPLC charomatogram

**
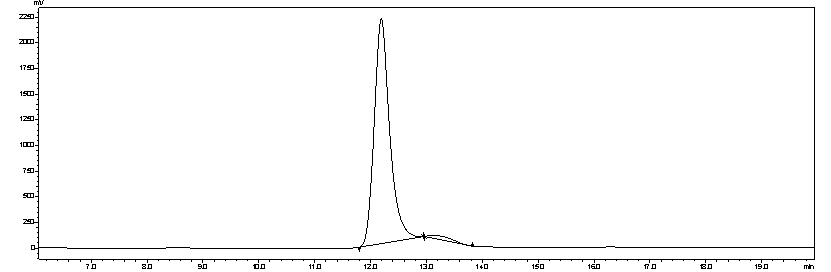
**

| Peak | Retention(min) | Area | Area % |
| --- | --- | --- | --- |
| 1 | 12.192 | 42165001 | 97.89 |
| 2 | 13.121 | 909548 | 2.11 |

1H NMR


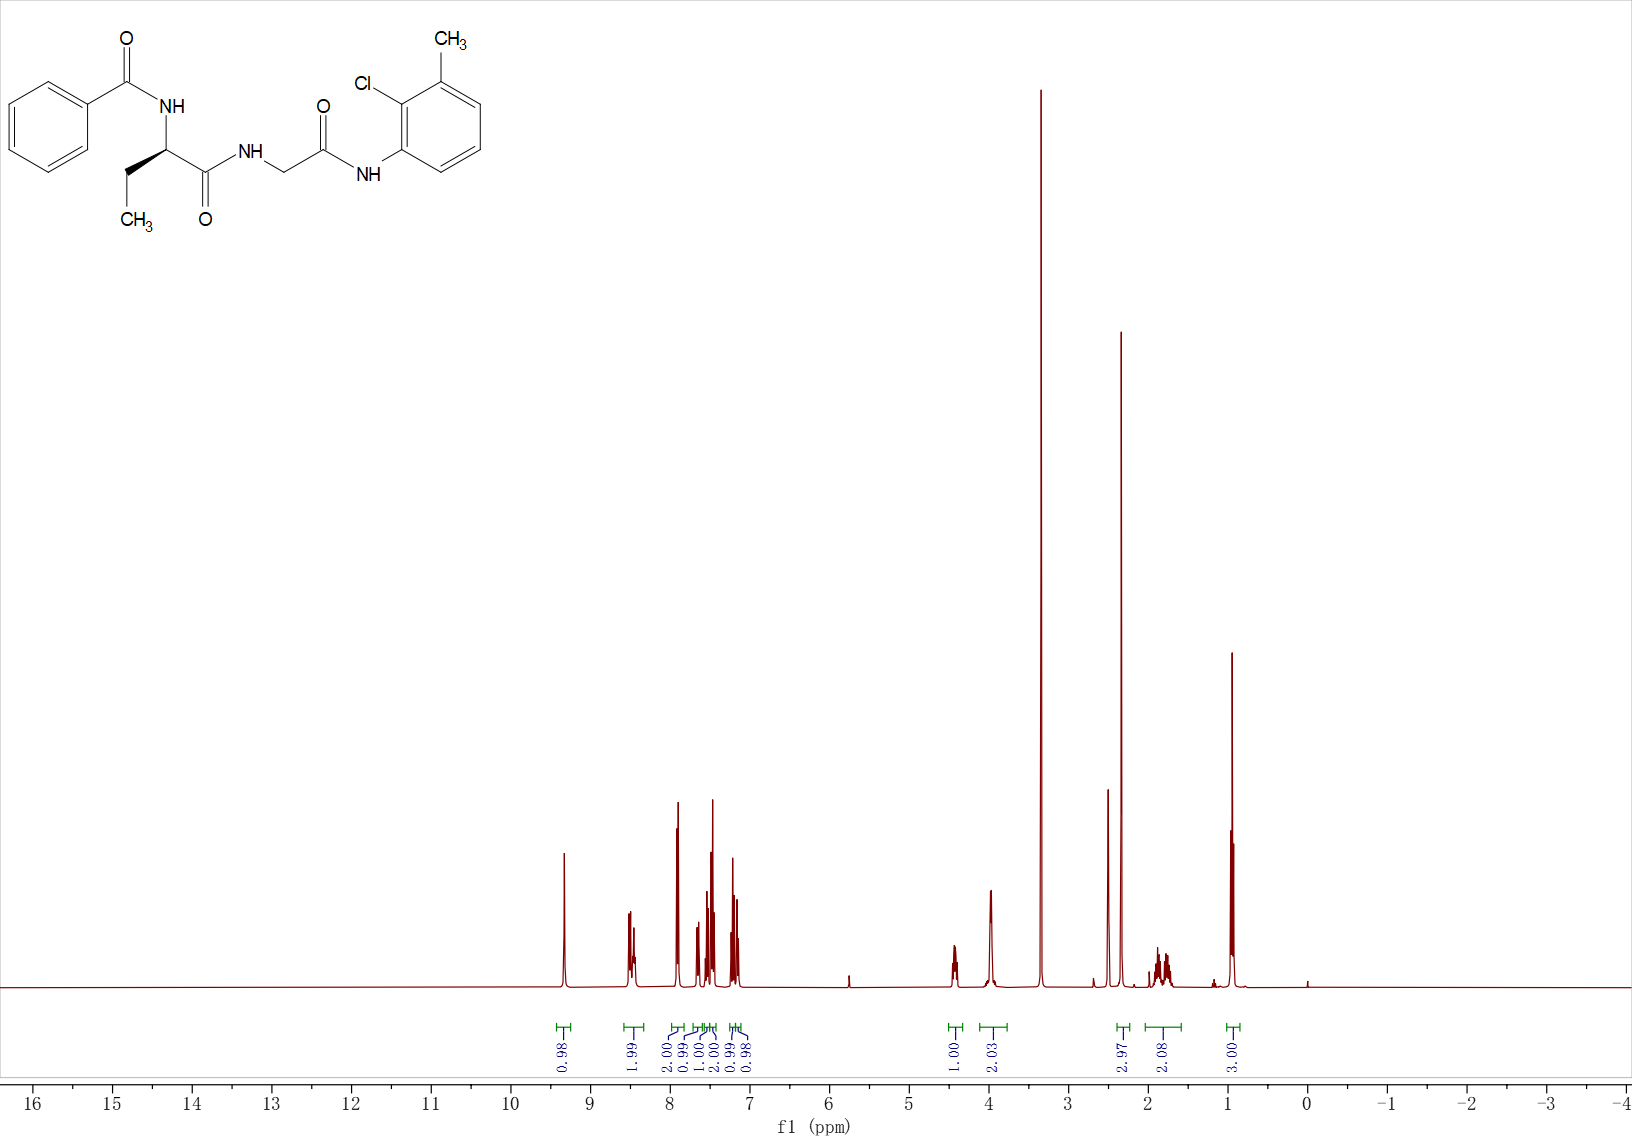


1H NMR (400 MHz, DMSO-*d6*, δ) 9.33 (s, 1H), 8.51 (d, *J* = 7.7 Hz, 1H), 8.46 (t, *J* = 5.8 Hz, 1H), 7.95 – 7.86 (m, 2H), 7.65 (dd, *J* = 8.1, 1.7 Hz, 1H), 7.60 – 7.51 (m, 1H), 7.51 – 7.39 (m, 2H), 7.22 (t, *J* = 7.8 Hz, 1H), 7.18 – 7.05 (m, 1H), 4.43 (ddd, *J* = 9.0, 7.6, 5.4 Hz, 1H), 3.98 (dd, *J* = 5.8, 2.1 Hz, 2H), 2.34 (s, 3H), 1.96 – 1.68 (m, 2H), 0.95 (t, *J* = 7.4 Hz, 3H).

13C NMR


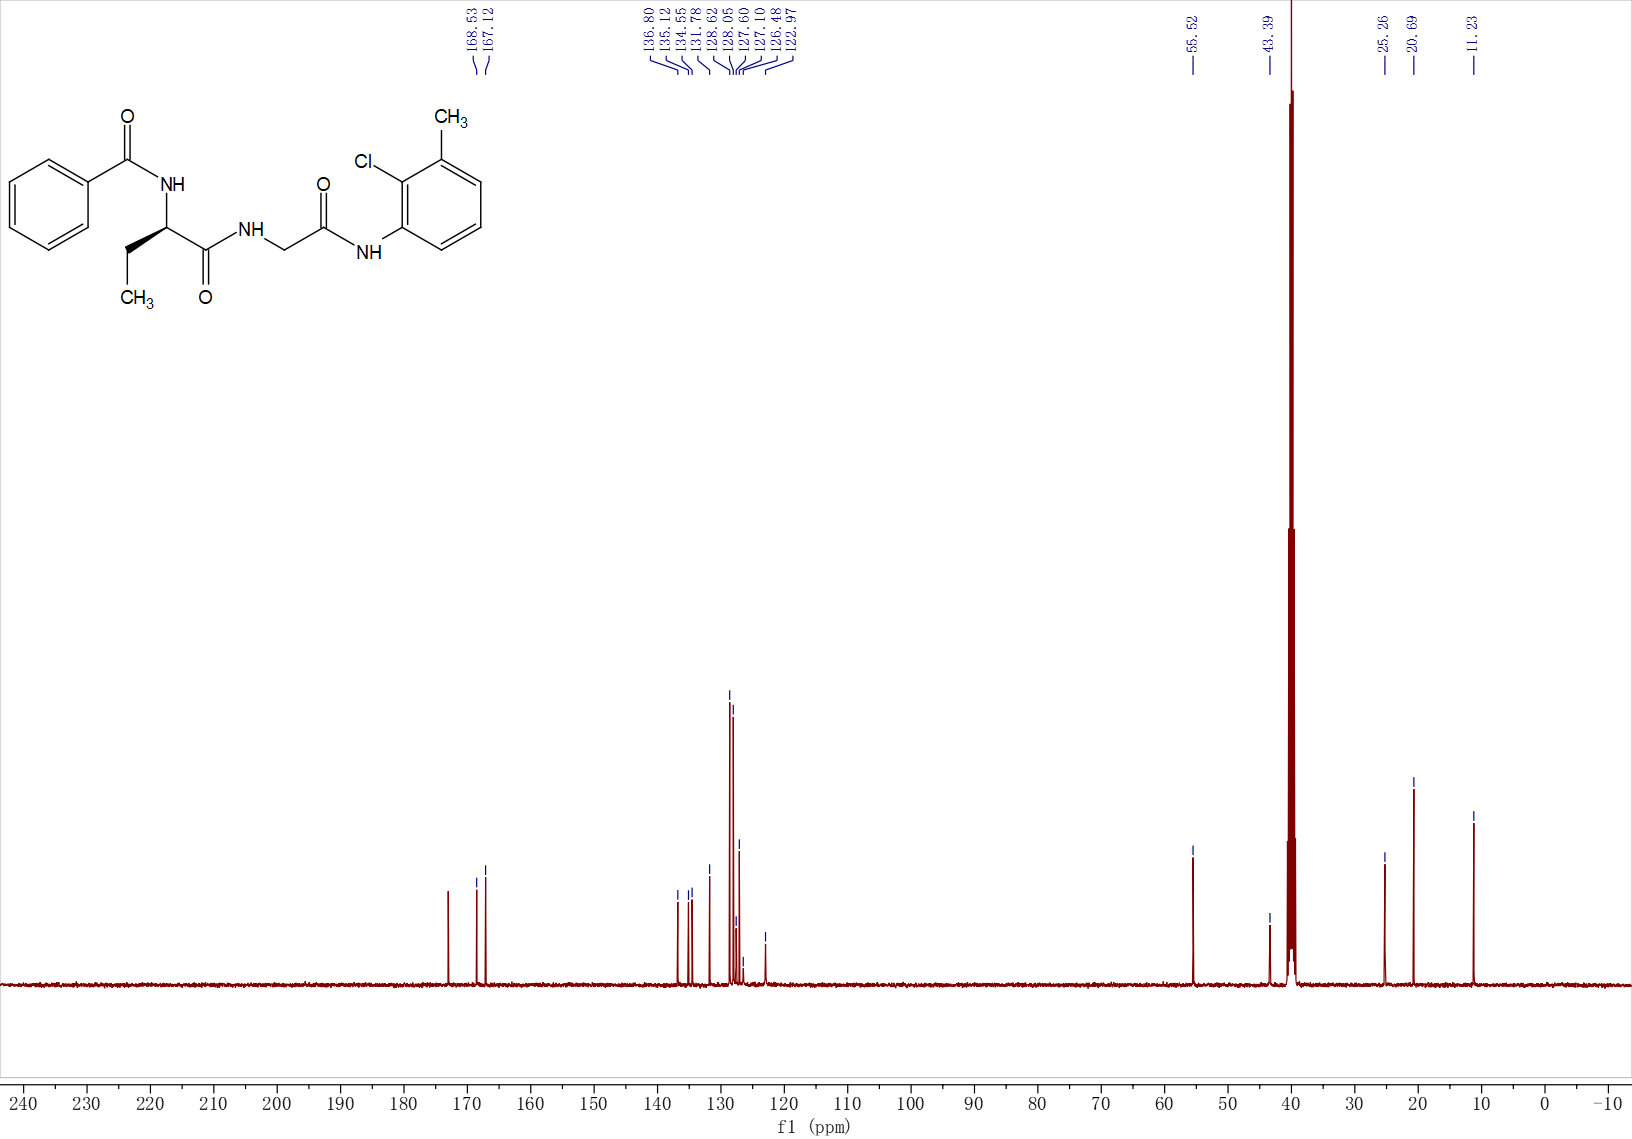


13C NMR (400 MHz, DMSO-*d6*, δ) 173.02, 168.53, 167.12, 136.80, 135.13, 134.55, 131.78, 128.62, 128.05, 127.59, 127.10, 126.48, 122.97, 55.52, 43.39, 25.26, 20.69, 11.23.

HRMS


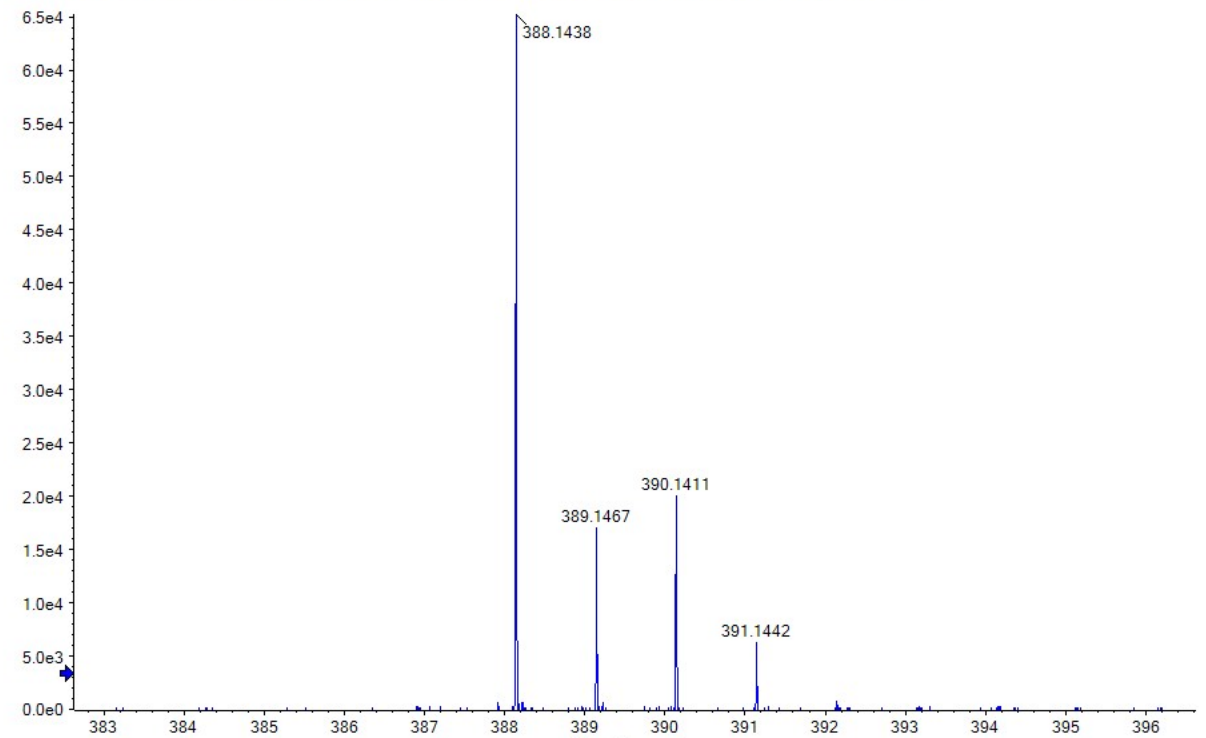


HRMS (ESI) m/z: [M + H]+ calcd for C20H23ClN3O3, 388.1423; found, 388.1438.

**SM4**

HPLC charomatogram

**
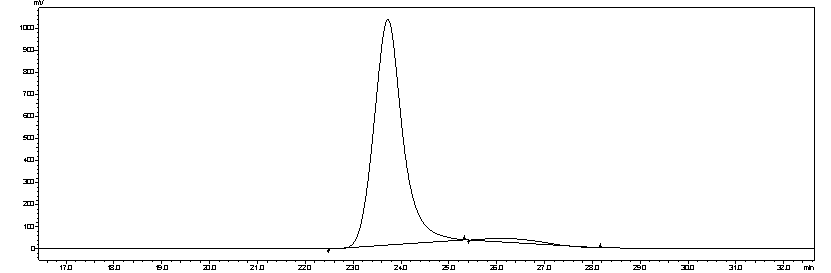
**

| Peak | Retention(min) | Area | Area % |
| --- | --- | --- | --- |
| 1 | 23.724 | 42736265 | 97.17 |
| 2 | 26.064 | 1243652 | 2.83 |

1H NMR


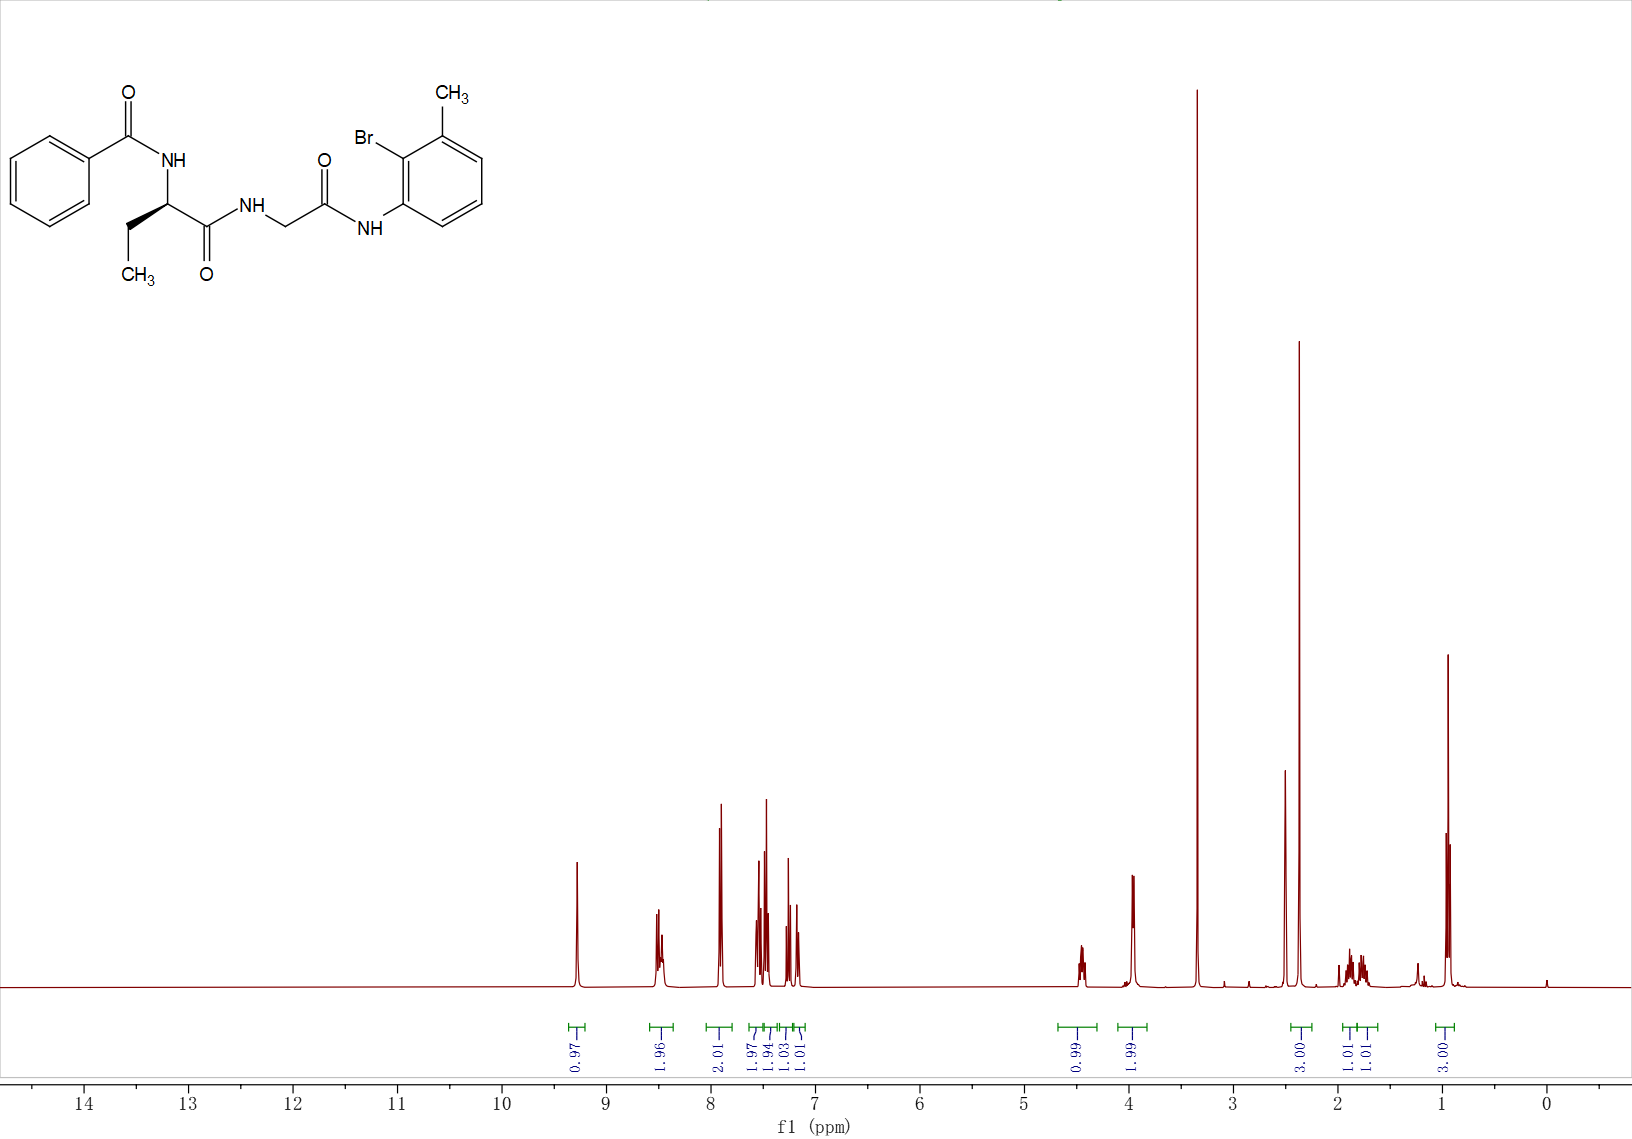


1H NMR (400 MHz, DMSO-*d6*, δ) 9.28 (s, 1H), 8.54 – 8.43 (m, 2H), 7.95 – 7.86 (m, 2H), 7.54 (ddt, *J* = 8.8, 6.4, 1.7 Hz, 2H), 7.50 – 7.40 (m, 2H), 7.26 (t, *J* = 7.8 Hz, 1H), 7.21 – 7.14 (m, 1H), 4.45 (ddd, *J* = 9.1, 7.8, 5.3 Hz, 1H), 3.96 (d, *J* = 5.8 Hz, 2H), 2.37 (s, 3H), 1.88 (tq, *J* = 12.8, 6.4 Hz, 1H), 1.76 (ddq, *J* = 14.4, 9.0, 7.3 Hz, 1H), 0.94 (t, *J* = 7.4 Hz, 3H).

13C NMR


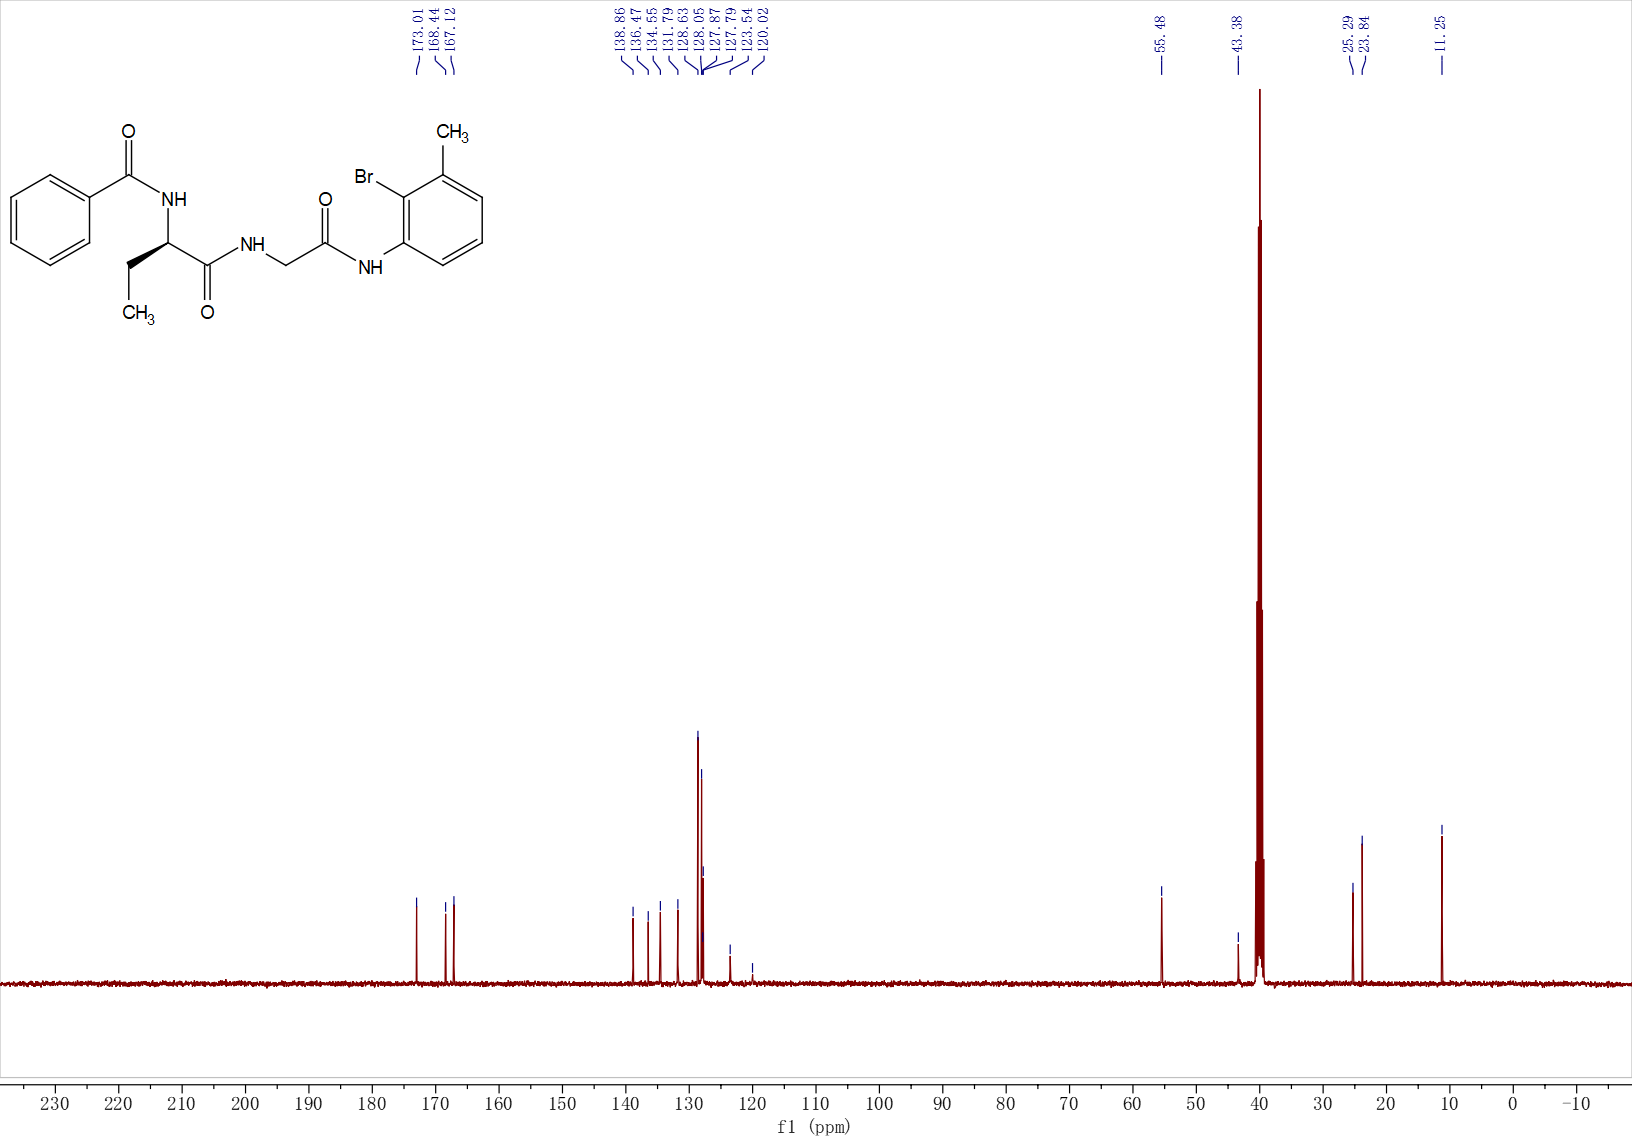


13C NMR (400 MHz, DMSO-*d6*, δ) 173.01, 168.44, 167.12, 138.86, 136.47, 134.55, 131.79, 128.63, 128.05, 127.87, 127.79, 123.54, 120.02, 55.48, 43.38, 25.29, 23.84, 11.25.

HRMS


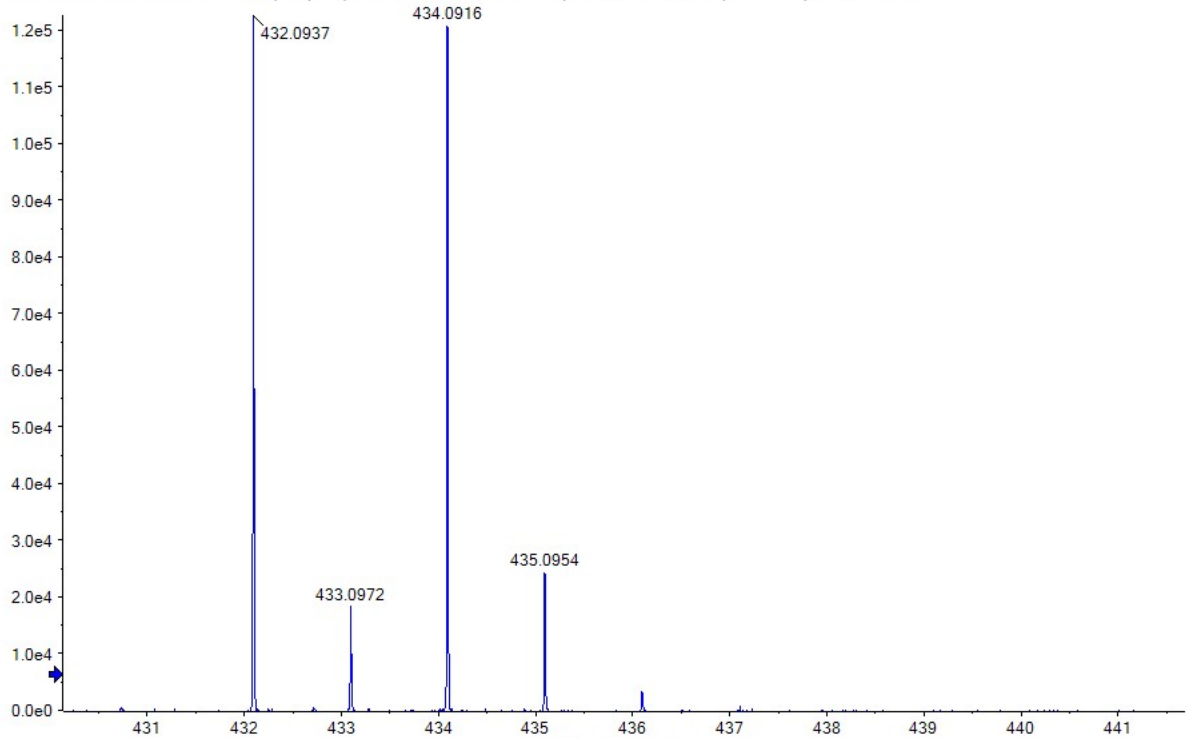


HRMS (ESI) m/z: [M + H]+ calcd for C20H23BrN3O3, 432.0918; found, 432.0937.

**SM5**

HPLC charomatogram

**
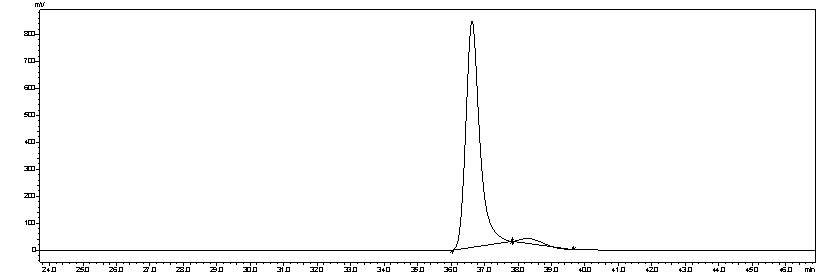
**

| Peak | Retention(min) | Area | Area % |
| --- | --- | --- | --- |
| 1 | 36.626 | 24320526 | 97.28 |
| 2 | 38.274 | 679921 | 2.72 |

1H NMR


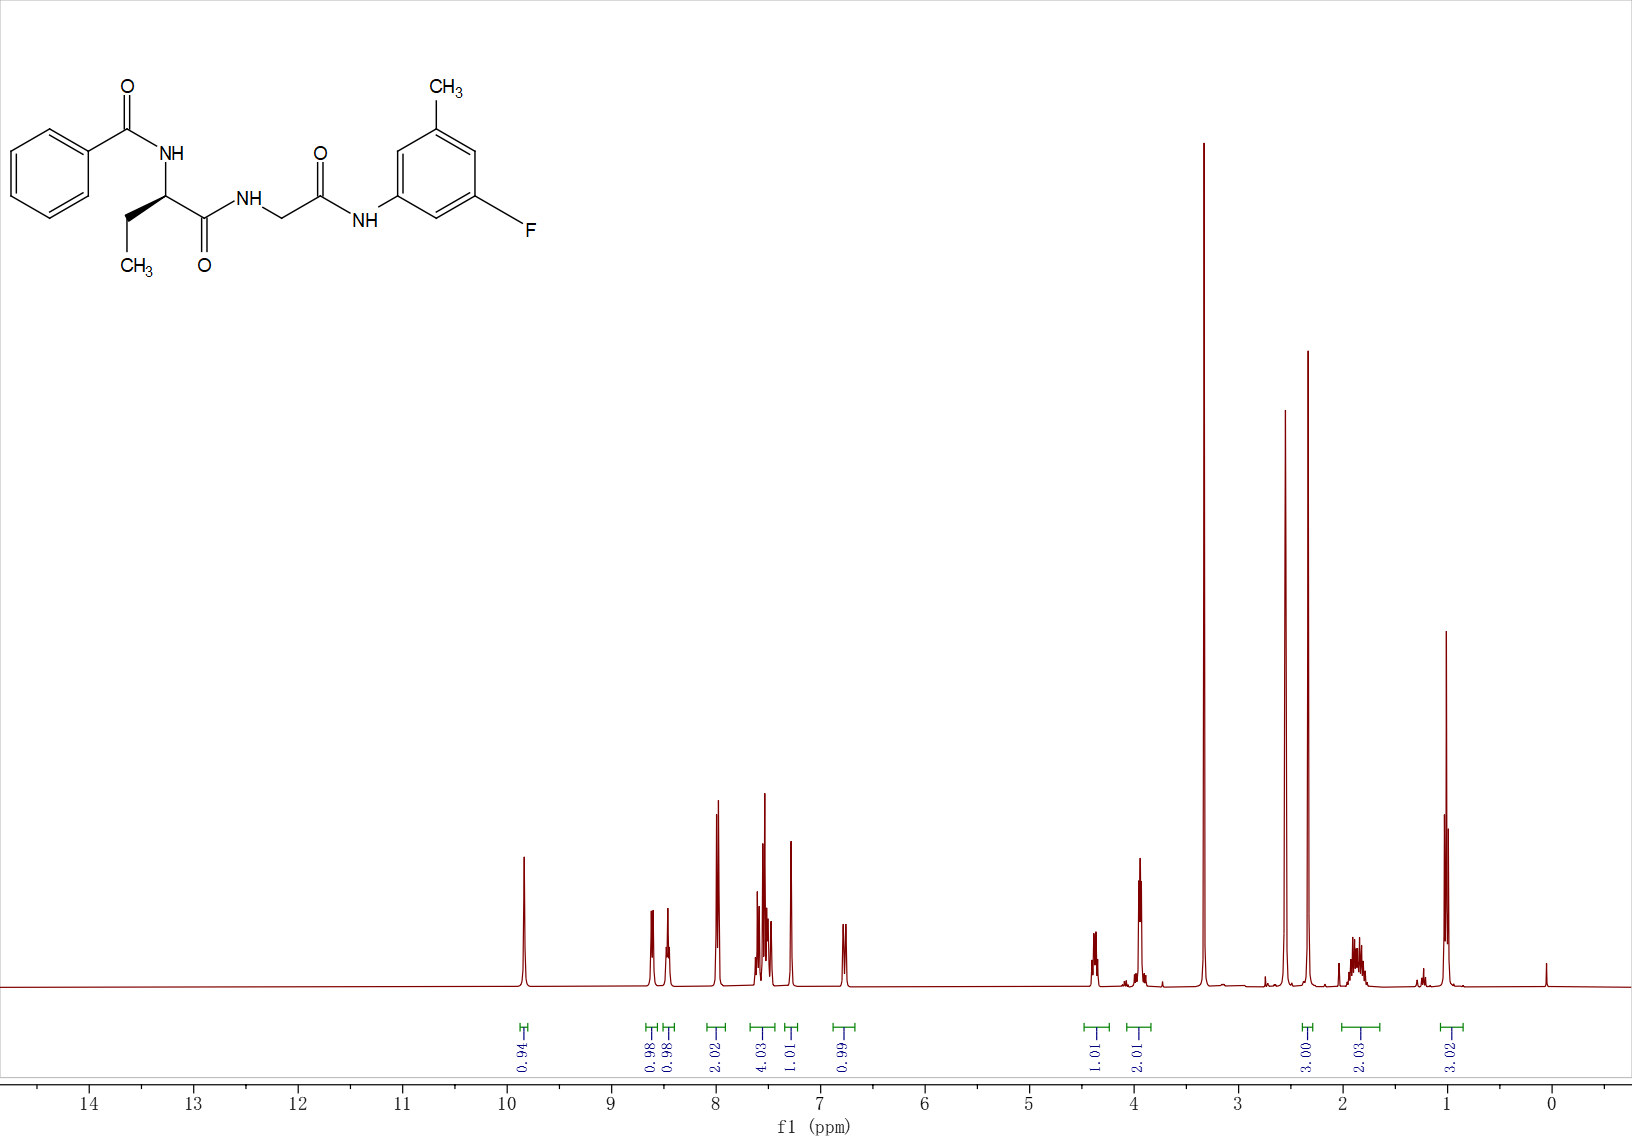


1H NMR (400 MHz, DMSO-*d6*, δ) 9.84 (s, 1H), 8.61 (d, *J* = 6.9 Hz, 1H), 8.46 (t, *J* = 5.9 Hz, 1H), 7.99 (dt, *J* = 7.0, 1.4 Hz, 2H), 7.65 – 7.45 (m, 4H), 7.28 (s, 1H), 6.84 – 6.73 (m, 1H), 4.38 (dt, *J* = 8.4, 6.2 Hz, 1H), 4.02 – 3.87 (m, 2H), 2.33 (s, 3H), 1.98 – 1.75 (m, 2H), 1.01 (t, *J* = 7.4 Hz, 3H).

13C NMR


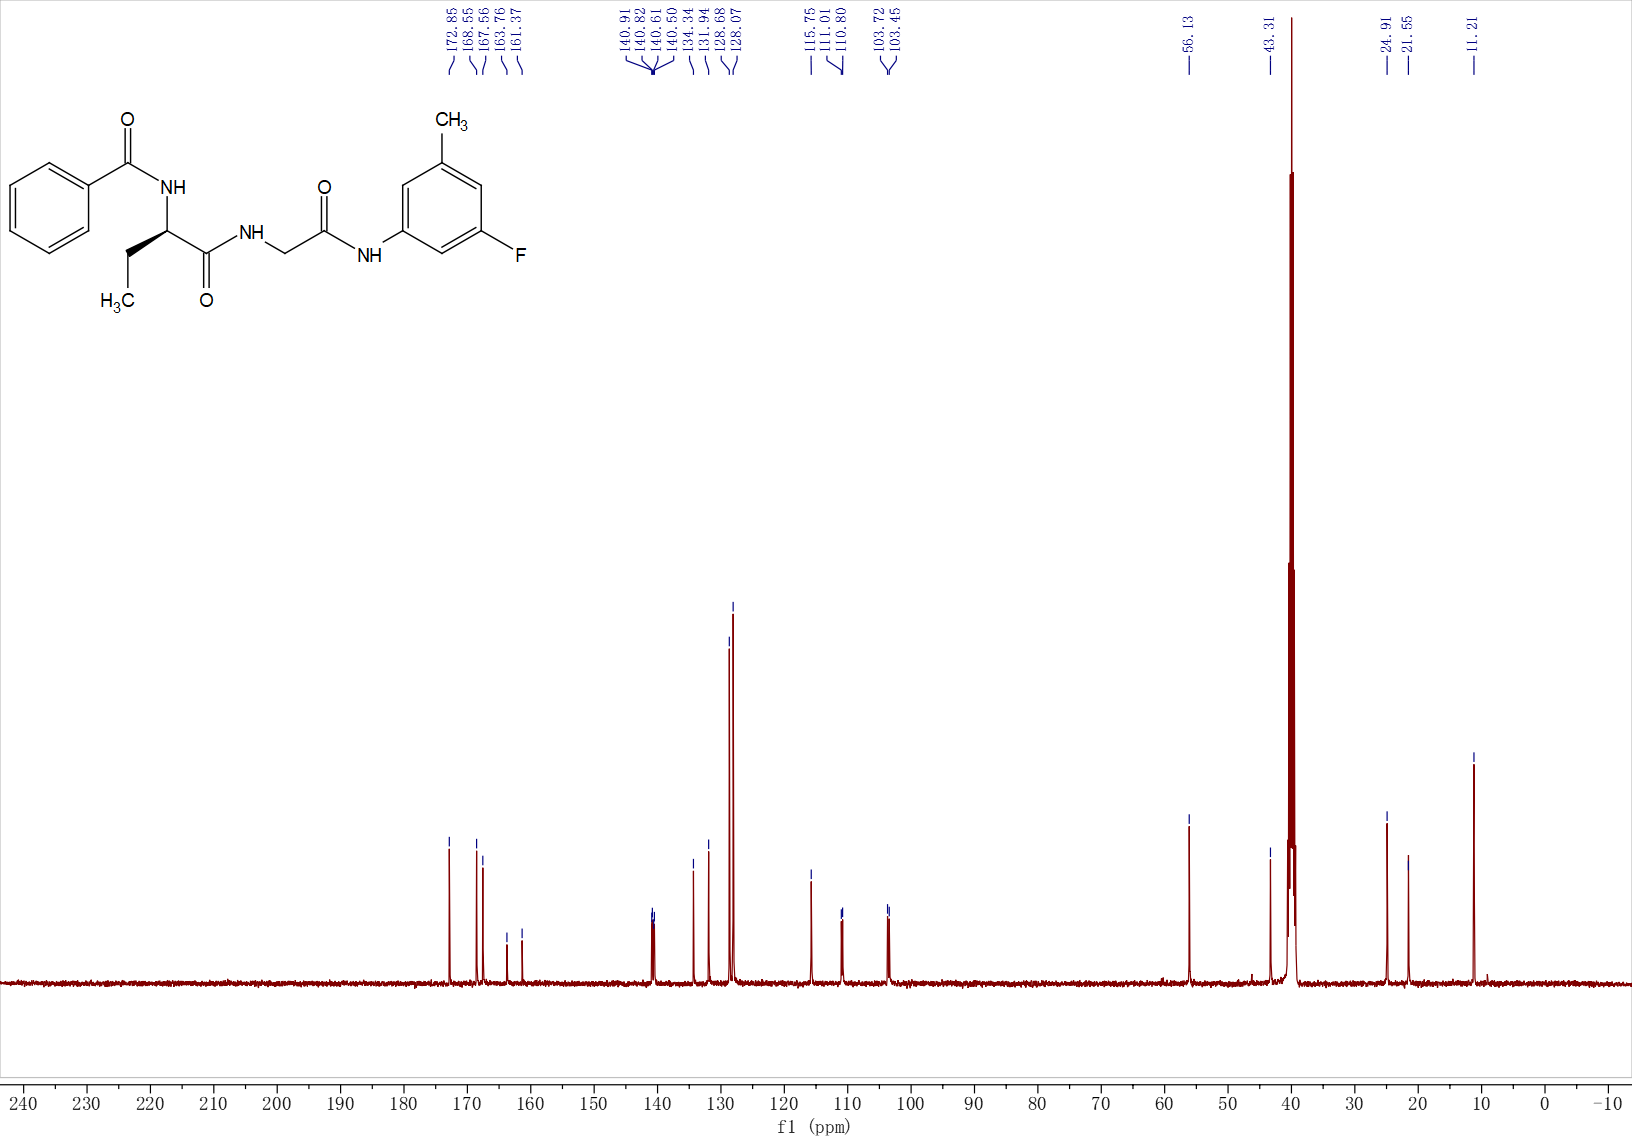


13C NMR (400 MHz, DMSO-*d6*, δ) 172.85, 168.55, 167.56, 163.76, 161.37, 140.91, 140.62, 134.34, 131.94, 128.68, 128.07, 115.75, 110.80, 103.72, 56.12, 43.31, 24.91, 21.55, 11.21.

HRMS


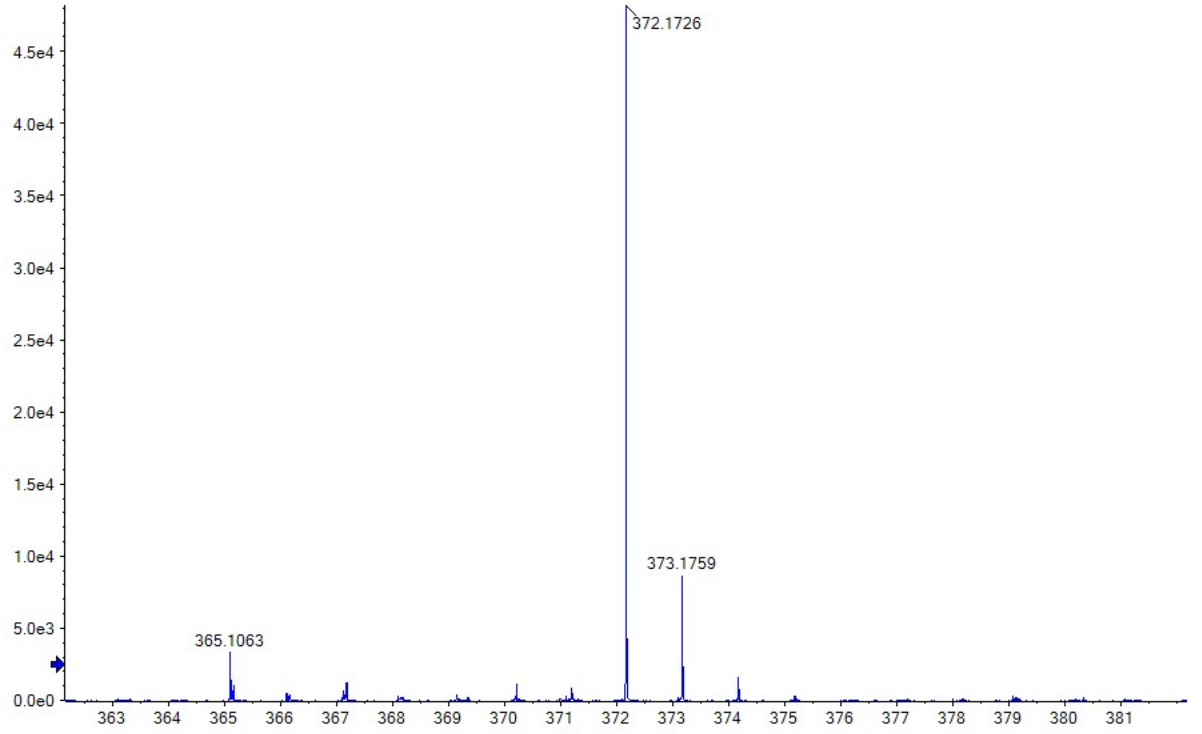
HRMS (ESI) m/z: [M + H]+ calcd for C20H23FN3O3, 372.1718; found, 372.1726.

**SM6**

HPLC charomatogram

**
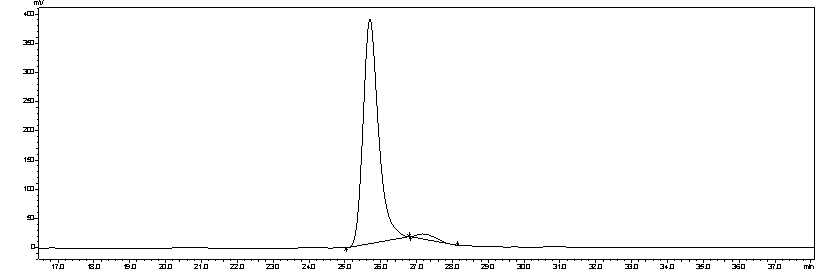
**

| Peak | Retention(min) | Area | Area % |
| --- | --- | --- | --- |
| 1 | 25.698 | 11520335 | 97.37 |
| 2 | 27.178 | 310926 | 2.63 |

1H NMR


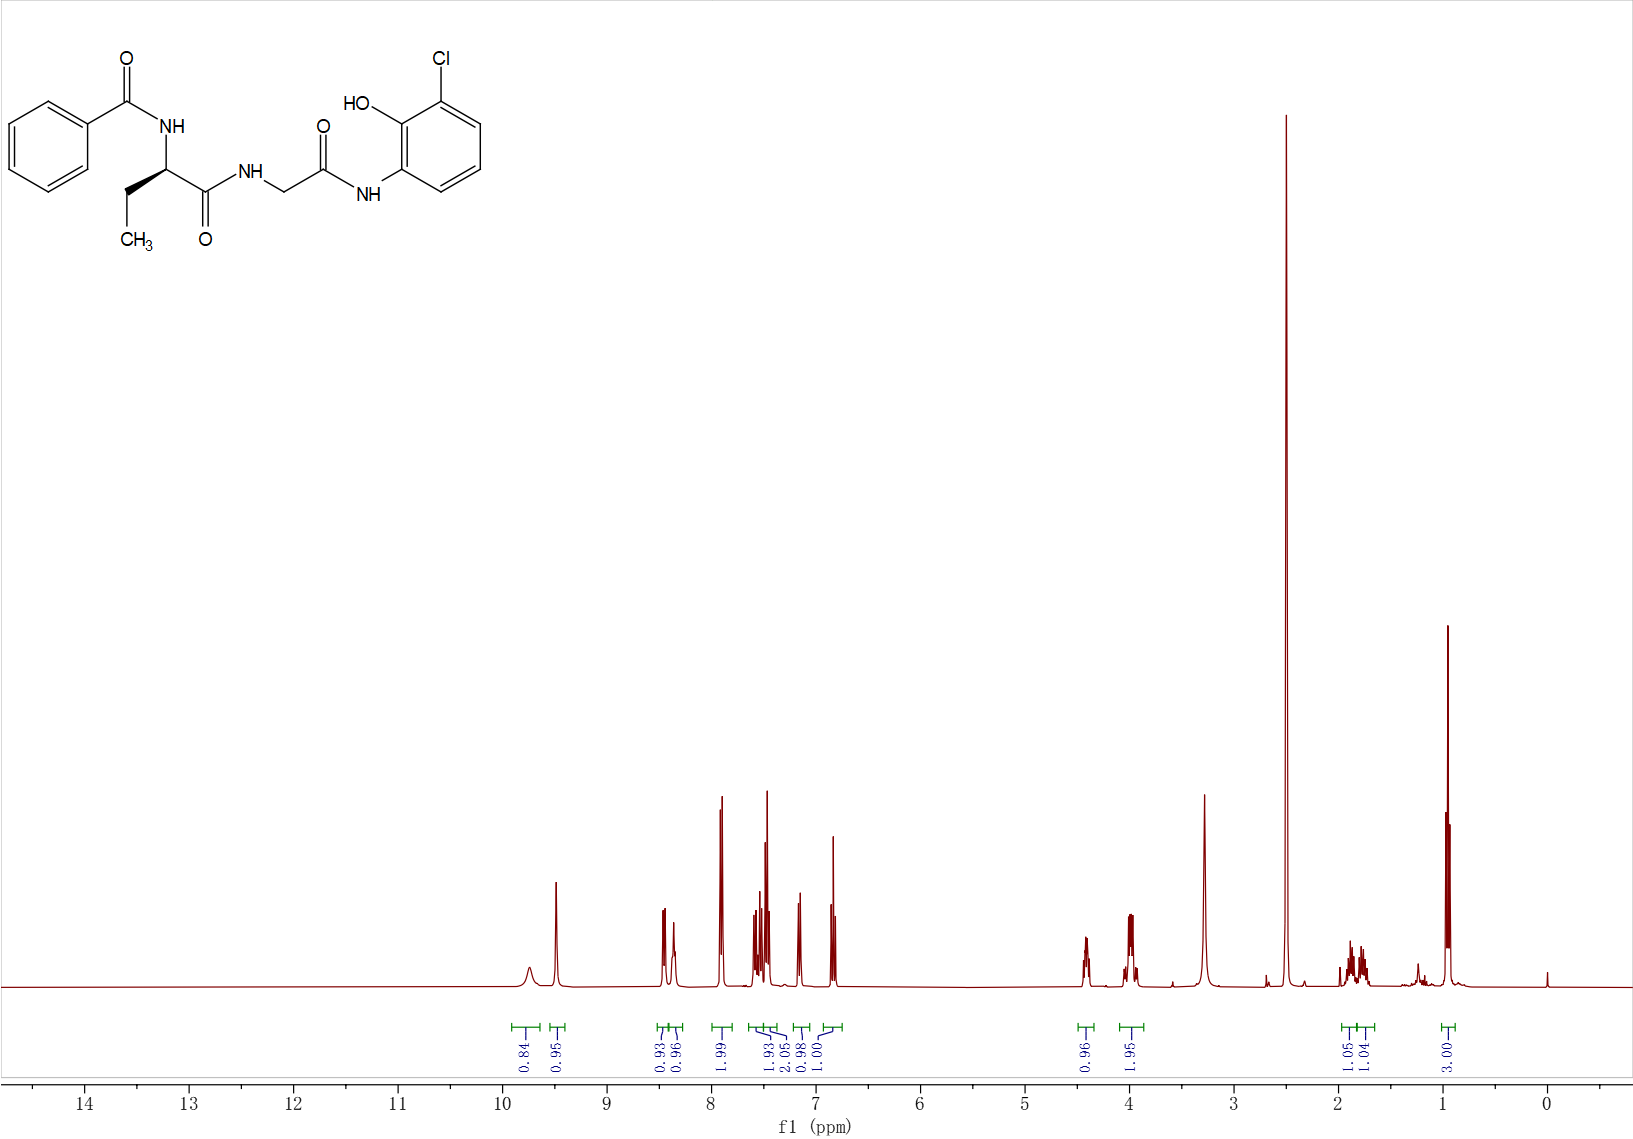


1H NMR (400 MHz, DMSO-*d6*, δ) 9.74 (s, 1H), 9.49 (s, 1H), 8.45 (d, *J* = 7.6 Hz, 1H), 8.36 (t, *J* = 5.8 Hz, 1H), 7.94 – 7.87 (m, 2H), 7.62 – 7.50 (m, 2H), 7.47 (dd, *J* = 8.2, 6.6 Hz, 2H), 7.16 (dd, *J* = 8.1, 1.5 Hz, 1H), 6.84 (t, *J* = 8.1 Hz, 1H), 4.41 (td, *J* = 8.4, 5.5 Hz, 1H), 4.07 – 3.90 (m, 2H), 1.89 (ddd, *J* = 13.2, 7.4, 5.6 Hz, 1H), 1.76 (ddd, *J* = 13.6, 8.9, 7.1 Hz, 1H), 0.95 (t, *J* = 7.4 Hz, 3H).

13C NMR


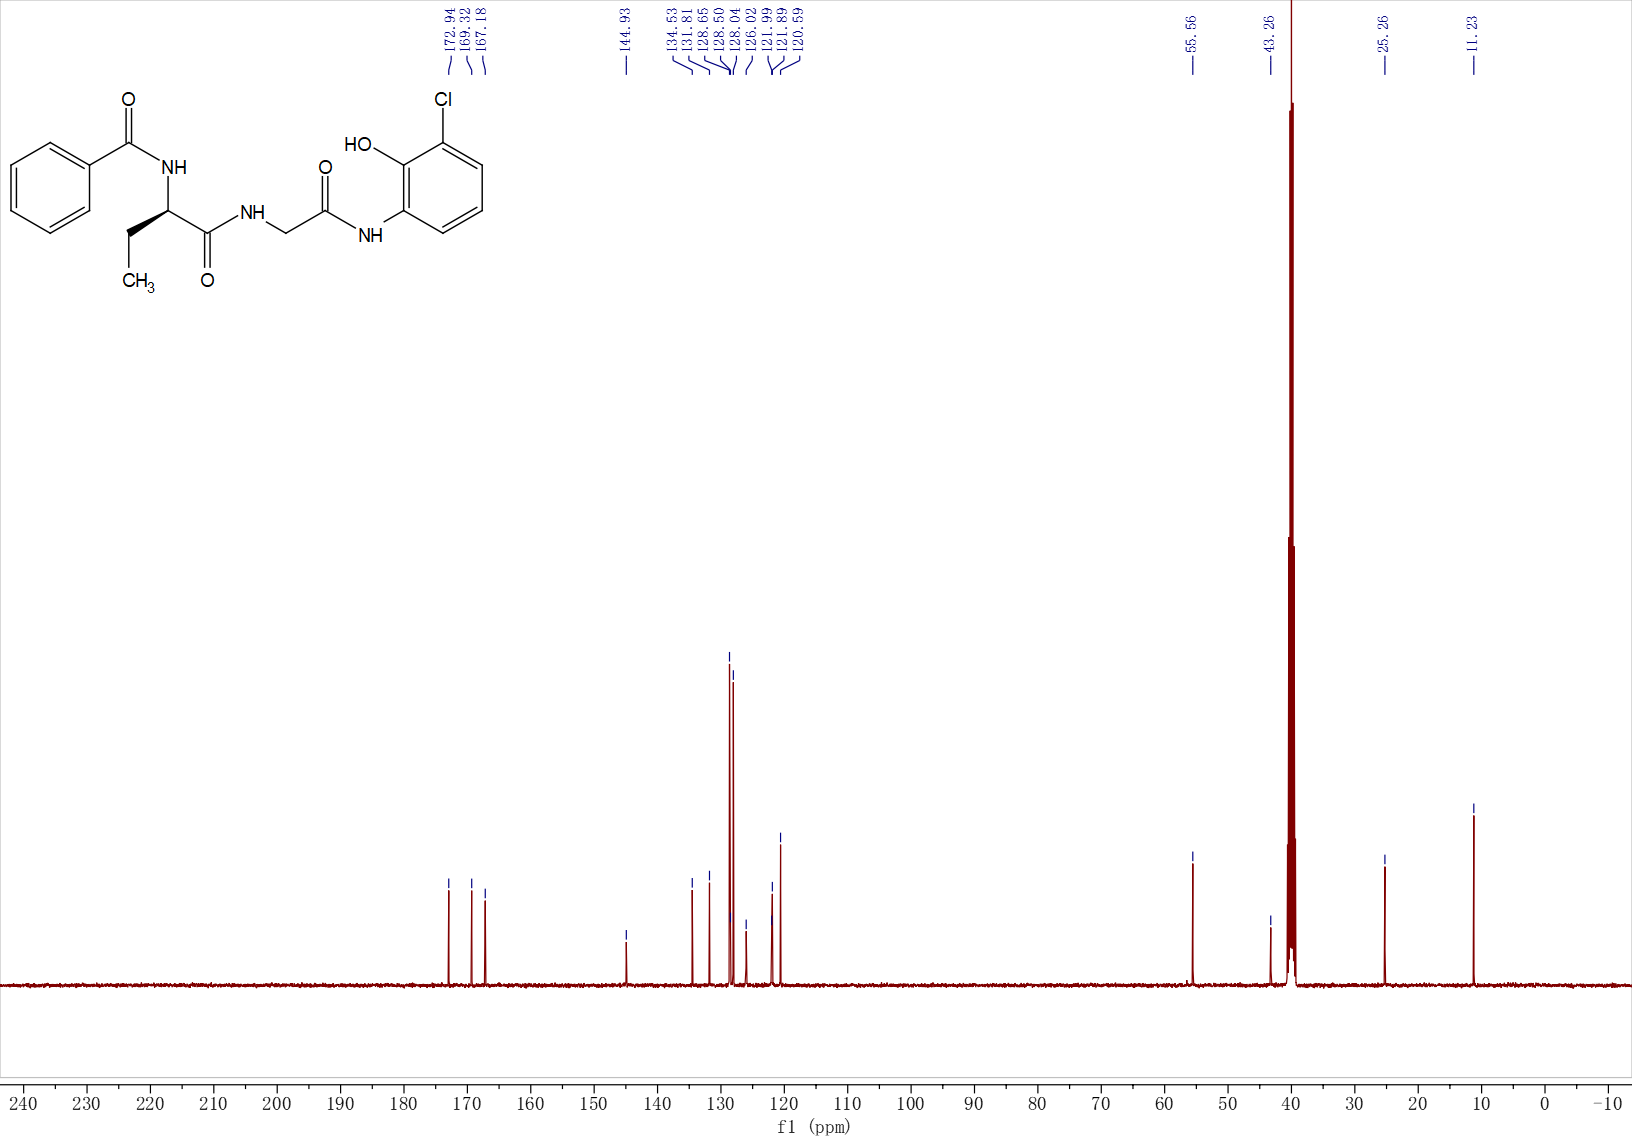


13C NMR (400 MHz, DMSO-*d6*, δ) 172.94, 169.32, 167.18, 144.93, 134.53, 131.81, 128.65, 128.50, 128.04, 126.02, 121.99, 121.89, 120.59, 55.56, 43.26, 25.26, 11.23.

HRMS


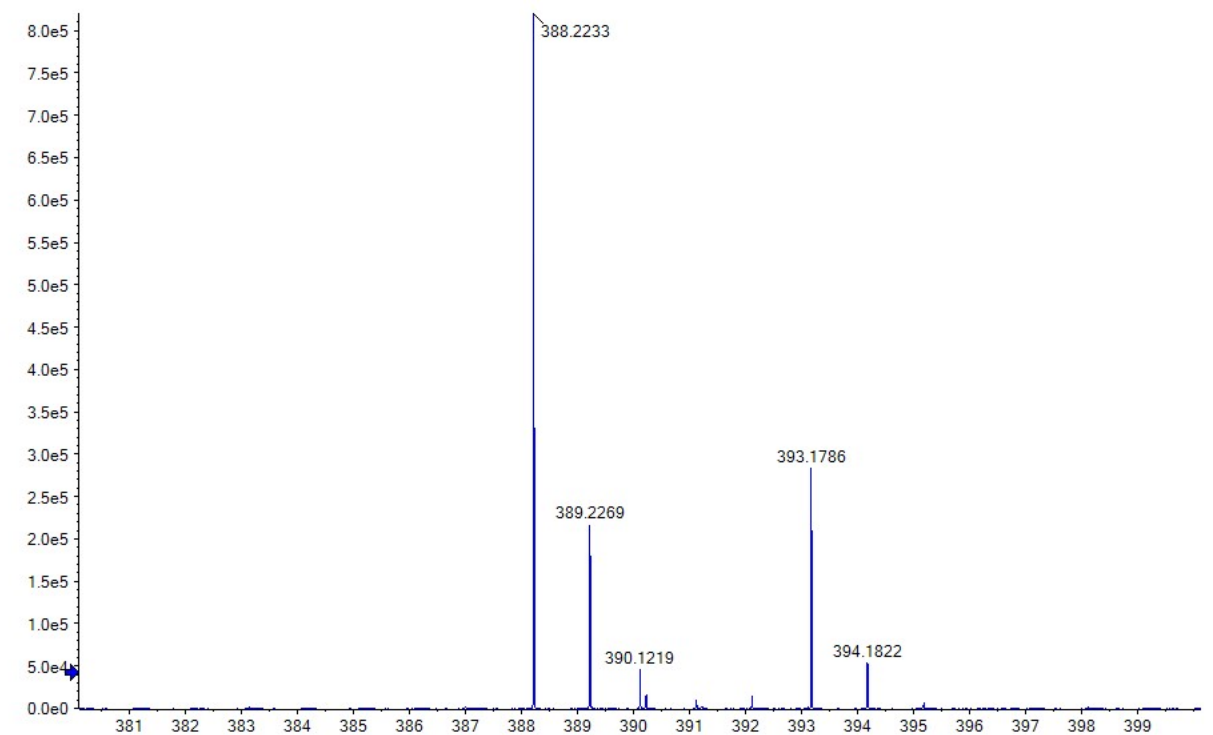


HRMS (ESI) m/z: [M + H]+ calcd for C19H22ClN3O3, 390.1216; found, 390.1219.

**Part IV. Pharmacokinetic study of compound SM1 in Kunming mice.**

*4.1 Reagents.*

DMSO (> 99.5%, cell culture grade, D8371, Solarbio); Methanol (HPLC grade, M116118-4L, Aladdin).

*4.2 Equipment*

SHIMADZU LCMS-8040; Centrifuge: D3024R, SCILO.

*4.3 Samples processing*

Plasma samples (50 μL) were mixed with 200 μL methanol. After mixing by pipetting and centrifuging for 10 min at 6,000 rpm, 2 μL of each supernatant was injected into LC-MS/MS system.

*4.4 HPLC-MS/MS Conditions*

**Chromatographic Conditions:**

Column: C18 (75 x 2.1 mm, 1.8um)

Mobile phase A: Water

Mobile phase B: Methanol

gradient: 90% B

Elution rate: 100 μL/min.

Column temperature: 30 ℃

**MS/MS Detection:**

Scan type: Positive MRM, lon source: Turbo spray, lonization mode: ESI

Nebulize gas: 3 L/min, Dry gas: 15 L/min

Ionspray voltage:3500 V, Temperature: 250°C

Parent,m/z :370.05

Daughter, m/z :105.10

Time: 10min

*4.5 Preparation of calibration standards*

A stock solution of **SM1** (2 mg/mL in DMSO) was diluted in blank mouse plasma to concentrations of 10,000, 5,000, 1,000, 500, 100, and 10 ng/mL. These were processed as in Section 4.3.

*4.6 Method validation results*

**Specificity**: Mice blank plasma had no interference with compound **SM1**, as shown in **Fig. S11.**


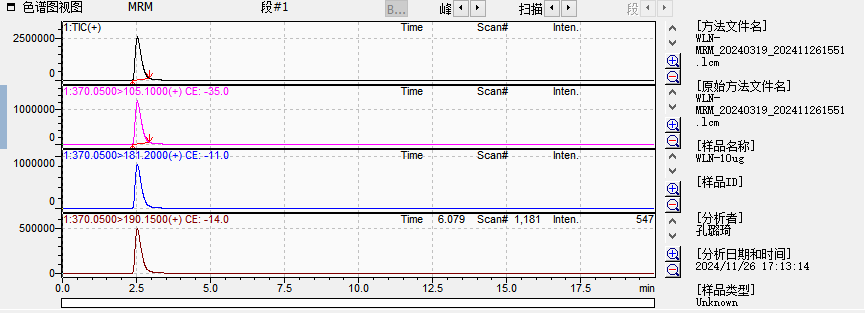


**Fig. S11**. Blank plasma sample spiked with compound **SM1** (10 μg/mL).

*4.7 Calibration curve*

The regression analysis of compound **SM1** was performed by plotting the peak area (y) against the concentration (x, μg/mL). The validity of the calibration curve (relationship between peak area ratio and compound concentration) is proved by the correlation coefficient (R) calculated for the linear regression (**Fig. S12**).

**Fig. S12**. Calibration curve for the quantification of compound **SM1**.

*4.8 Results*

Plasma concentrations of **SM1** after intraperitoneal administration (30 mg/kg) are listed in **Tables S5**. PK Curve is performed automatically by DAS2.0.

**Table S5.** Plasma concentration of compound **SM1** in male Kunming mice following intraperitoneal (30 mg/kg) administration.

| Sample collection time point (h) | Plasma concentration (μg/mL) | | | | |
| --- | --- | --- | --- | --- | --- |
| A | B | C | Mean | SD |
| 0.25 | 7.37 | 4.07 | 4.12 | 5.19 | 1.89 |
| 0.5 | 4.17 | 4.19 | 2.97 | 3.78 | 0.70 |
| 0.75 | 1.92 | 1.21 | 0.94 | 1.46 | 0.50 |
| 1 | 0.62 | 0.60 | 0.84 | 0.68 | 0.13 |
| 1.5 | 0.42 | 0.59 | 0.84 | 0.62 | 0.21 |
| 2 | 0.43 | 0.22 | 0.27 | 0.31 | 0.11 |
| 4 | 0.42 | 0.25 | 0.23 | 0.30 | 0.10 |
| 6 | 0.24 | 0.24 | 0.27 | 0.25 | 0.02 |
| 8 | 0.43 | 0.39 | 0.39 | 0.40 | 0.02 |
| 12 | 0.19 | 0.19 | 0.18 | 0.18 | 0.01 |
| 24 | ND a) | ND a) | 0.15 | 0.05 | 0.09 |

a)ND – Not detected

**Part V. Details for AI-Driven Mini-Binder to Small-Molecule Conversion for PPI inhibitors.**

We introduce a protocol integrating transfer learning and reinforcement learning to generate active small molecules from highly active mini-binders. The protocol comprises the following key steps.

*5.1. Tripeptide Fragment Library Construction*

**Fig. S13**A details the development of an active tripeptide fragment library derived from the high-activity mini-binder. Key amino acids (residues within 3.5 Å of the target protein) serve as the foundation for assembling the 3-peptide active structure database according to specific rules:

(i) Single-residue blocks: For an isolated key amino acid, it is flanked by one upstream and one downstream residue (or the same residue if adjacent residues are absent) to create a 3-peptide.

(ii) 2-residues blocks: Two adjacent key residues are extended by incorporating either the preceding or succeeding residue to generate a 3-peptide.

(iii) Three or More-residues blocks: Overlapping sets of three consecutive key residues directly constitute individual 3-peptides using a sliding window approach (residue 1-2-3, 2-3-4, etc.)


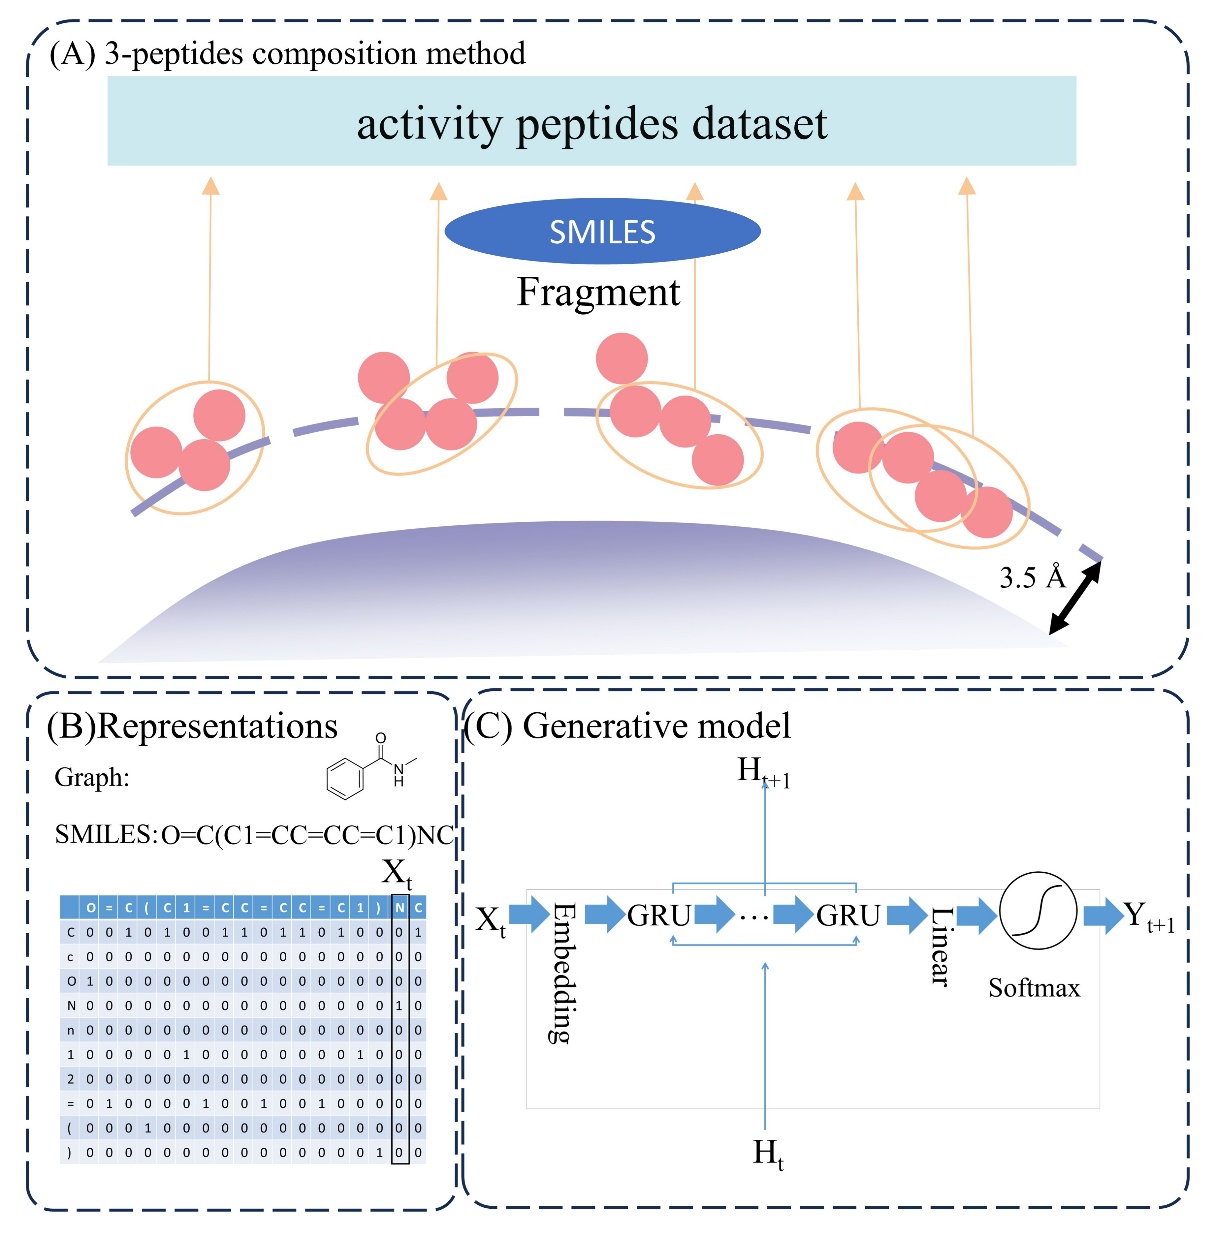


**Fig. S13.** (A) 3-peptides composition method (B) The molecules were represented by SMILES and one-hot encoding. (C) The generative model (GRU).

*5.2. Molecular Representation and Encoding*

Depicted in **Fig. S13**B, each 3-peptide is expressed as a SMILES string. This representation encodes constituent atoms and employs special characters to indicate ring openings/closures and branch points. These SMILES strings are subsequently converted into one-hot encoded vectors, with **Xt** signifying the input vector at processing step **t**.

*5.3. Generative Model Construction*

Illustrated in **Fig. S13**C, the generative model utilizes a Gated Recurrent Unit (GRU), a specific variant of Recurrent Neural Network (RNN). RNNs are inherently suited for sequential data processing due to their ability to retain relevant historical information. The architecture incorporates a configurable number of GRU layers, culminating in a final linear layer. The dimensionality of this output layer matches the vocabulary size, encompassing all unique tokens derived from the processed dataset. A softmax transformation follows the linear layer, producing a probability distribution across all possible tokens. Here, **Ht**corresponds to the hidden state vector at step **t**.

*5.4. Transfer Learning*

The model was pre-trained on a clustered ChEMBL subset, which equips the model to navigate a diverse chemical landscape. Subsequently, this pre-trained model undergoes fine-tuning using the Tripeptide Fragment Library. This fine-tuning process yields a "focused prior" model.

*5.5. Reinforcement Learning (RL)*

Within the RL framework (**Fig. 2**A), the "focused prior" model serves as the generative agent. Both the prior model and the RL agent possess identical network architectures and utilize the same vocabulary. Generated SMILES were evaluated using a multi-parameter objective (MPO) score.

Negative log-likelihood (NLL), defined as:

(S1) where P(**Xi**=**Ti**|**Xi−1**, …) is the probability of sampling token **Ti** at step **Xi** given previously sampled tokens.

MPO scoring assesses SMILES strings, producing scores within the range [0, +∞). The MPO score is integrated with the prior model's likelihood to derive the augmented negative log-likelihood:

(S2)

Where σ is a scalar adjusting the MPO score's scale.
